# Supplementary material for: Prevalence and determinants of unplanned pregnancy in HIV-positive and HIV-negative pregnant women in Cape Town, South Africa: a cross-sectional study
Source: PubMed Central journal article supplement — BMJ Open. 2018 Apr 3;8(4):e019979. doi: 10.1136/bmjopen-2017-019979 (PMC5892733; doi:10.1136/bmjopen-2017-019979), 2018-04-03
Supplement: bmjopen-2017-019979.draft_revisions.pdf [file bmjopen-2017-019979.draft_revisions.pdf]

# BMJ Open

BMJ Open is committed to open peer review. As part of this commitment we make the peer review history of every article we publish publicly available.

When an article is published we post the peer reviewers' comments and the authors' responses online. We also post the versions of the paper that were used during peer review. These are the versions that the peer review comments apply to.

The versions of the paper that follow are the versions that were submitted during the peer review process. They are not the versions of record or the final published versions. They should not be cited or distributed as the published version of this manuscript.

BMJ Open is an open access journal and the full, final, typeset and author-corrected version of record of the manuscript is available on our site with no access controls, subscription charges or pay-per-view fees (<http://bmjopen.bmj.com>).

If you have any questions on BMJ Open's open peer review process please email [info.bmjopen@bmj.com](mailto:info.bmjopen@bmj.com)

# BMJ Open

## Prevalence and determinants of unplanned pregnancy in HIV-positive and HIV-negative pregnant women in Cape Town, South Africa: a cross-sectional study

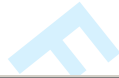

|                                 |                                                                                                                                                                                                                                                                                                                                                                                                                                                                                                                                                                                                                                                                                                                                                                                                                                                                                                                                                                                                                                                                                                                                                                                                                                                                                                                                                                                                                                                                                                                                                                                                                                                                                                                                                                                                                                 |
|---------------------------------|---------------------------------------------------------------------------------------------------------------------------------------------------------------------------------------------------------------------------------------------------------------------------------------------------------------------------------------------------------------------------------------------------------------------------------------------------------------------------------------------------------------------------------------------------------------------------------------------------------------------------------------------------------------------------------------------------------------------------------------------------------------------------------------------------------------------------------------------------------------------------------------------------------------------------------------------------------------------------------------------------------------------------------------------------------------------------------------------------------------------------------------------------------------------------------------------------------------------------------------------------------------------------------------------------------------------------------------------------------------------------------------------------------------------------------------------------------------------------------------------------------------------------------------------------------------------------------------------------------------------------------------------------------------------------------------------------------------------------------------------------------------------------------------------------------------------------------|
| Journal:                        | <i>BMJ Open</i>                                                                                                                                                                                                                                                                                                                                                                                                                                                                                                                                                                                                                                                                                                                                                                                                                                                                                                                                                                                                                                                                                                                                                                                                                                                                                                                                                                                                                                                                                                                                                                                                                                                                                                                                                                                                                 |
| Manuscript ID                   | bmjopen-2017-019979                                                                                                                                                                                                                                                                                                                                                                                                                                                                                                                                                                                                                                                                                                                                                                                                                                                                                                                                                                                                                                                                                                                                                                                                                                                                                                                                                                                                                                                                                                                                                                                                                                                                                                                                                                                                             |
| Article Type:                   | Research                                                                                                                                                                                                                                                                                                                                                                                                                                                                                                                                                                                                                                                                                                                                                                                                                                                                                                                                                                                                                                                                                                                                                                                                                                                                                                                                                                                                                                                                                                                                                                                                                                                                                                                                                                                                                        |
| Date Submitted by the Author:   | 06-Oct-2017                                                                                                                                                                                                                                                                                                                                                                                                                                                                                                                                                                                                                                                                                                                                                                                                                                                                                                                                                                                                                                                                                                                                                                                                                                                                                                                                                                                                                                                                                                                                                                                                                                                                                                                                                                                                                     |
| Complete List of Authors:       | <p>Iyun, Victoria; University of Cape Town, Division of Epidemiology &amp; Biostatistics, School of Public health and Family Medicine; University of Cape Town, Centre for Infectious Disease Epidemiology &amp; Research, School of Public Health &amp; Family Medicine</p> <p>Brittain, Kirsty ; University of Cape Town, Division of Epidemiology &amp; Biostatistics, School of Public Health &amp; Family Medicine; University of Cape Town, Centre for Infectious Disease Epidemiology &amp; Research, School of Public Health and Family Medicine</p> <p>Phillips, Tamsin; University of Cape Town, Division of Epidemiology &amp; Biostatistics, School of Public Health &amp; Family Medicine; University of Cape Town, Centre for Infectious Disease Epidemiology &amp; Research, School of Public health and Family Medicine</p> <p>le Roux, Stanzi; University of Cape Town, Division of Epidemiology &amp; Biostatistics, School of Public health and Family Medicine</p> <p>McIntyre, James; University of Cape Town, Division of Epidemiology &amp; Biostatistics, School of Public health and Family Medicine; Anova Health Institute</p> <p>Zerbe, A; Columbia University, ICAP at Columbia, Mailman School of Public Health</p> <p>Petro, Greg; University of Cape Town, Department of Obstetrics &amp; Gynaecology; New Somerset Hospital</p> <p>Abrams, Elaine; Columbia University, ICAP at Columbia, Mailman School of Public Health; Columbia University, College of Physicians &amp; Surgeons</p> <p>Myer, Landon; University of Cape Town, Division of Epidemiology &amp; Biostatistics, School of Public Health &amp; Family Medicine, University of Cape Town; University of Cape Town, Centre for Infectious Disease Epidemiology &amp; Research, School of Public Health &amp; Family Medicine</p> |
| <b>Primary Subject Heading</b>: | Public health                                                                                                                                                                                                                                                                                                                                                                                                                                                                                                                                                                                                                                                                                                                                                                                                                                                                                                                                                                                                                                                                                                                                                                                                                                                                                                                                                                                                                                                                                                                                                                                                                                                                                                                                                                                                                   |
| Secondary Subject Heading:      | Infectious diseases, Epidemiology, HIV/AIDS, Sexual health                                                                                                                                                                                                                                                                                                                                                                                                                                                                                                                                                                                                                                                                                                                                                                                                                                                                                                                                                                                                                                                                                                                                                                                                                                                                                                                                                                                                                                                                                                                                                                                                                                                                                                                                                                      |
| Keywords:                       | unplanned pregnancy, contraception, family planning, HIV, women                                                                                                                                                                                                                                                                                                                                                                                                                                                                                                                                                                                                                                                                                                                                                                                                                                                                                                                                                                                                                                                                                                                                                                                                                                                                                                                                                                                                                                                                                                                                                                                                                                                                                                                                                                 |
|                                 |                                                                                                                                                                                                                                                                                                                                                                                                                                                                                                                                                                                                                                                                                                                                                                                                                                                                                                                                                                                                                                                                                                                                                                                                                                                                                                                                                                                                                                                                                                                                                                                                                                                                                                                                                                                                                                 |

1  
2  
3  
4  
5  
6  
7  
8  
9  
10  
11  
12  
13  
14  
15  
16  
17  
18  
19  
20  
21  
22  
23  
24  
25  
26  
27  
28  
29  
30  
31  
32  
33  
34  
35  
36  
37  
38  
39  
40  
41  
42  
43  
44  
45  
46  
47  
48  
49  
50  
51  
52  
53  
54  
55  
56  
57  
58  
59  
60

SCHOLARONE™  
Manuscripts

For peer review only

1  
2  
3 Title

4 **Prevalence and determinants of unplanned pregnancy in HIV-positive and HIV-**  
5 **negative pregnant women in Cape Town, South Africa: a cross-sectional study**  
6

7  
8  
9 Short title

10 *Unplanned pregnancy among HIV-positive and HIV-negative pregnant women in South*  
11 *Africa*  
12

13  
14 Authors

15 Victoria Iyun<sup>1,2</sup>, Kirsty Brittain<sup>1,2</sup>, Tamsin K. Phillips<sup>1,2</sup>, Stanzi le Roux<sup>1</sup>, James A.  
16 McIntyre<sup>1,3</sup>, Allison Zerbe<sup>4</sup>, Greg Petro<sup>5</sup>, Elaine J. Abrams<sup>4,6</sup>, Landon Myer<sup>1,2\*</sup>  
17

- 18  
19 1. Division of Epidemiology & Biostatistics, School of Public Health & Family Medicine,  
20 University of Cape Town, Cape Town, South Africa  
21 2. Centre for Infectious Disease Epidemiology & Research, School of Public Health &  
22 Family Medicine, University of Cape Town, Cape Town, South Africa  
23 3. Anova Health Institute, Johannesburg, South Africa  
24 4. ICAP at Columbia, Mailman School of Public Health, Columbia University, New York,  
25 USA  
26 5. Department of Obstetrics & Gynaecology, University of Cape Town & New Somerset  
27 Hospital, Cape Town, South Africa  
28 6. College of Physicians & Surgeons, Columbia University, New York, USA  
29  
30

31 \*Corresponding author:  
32

33 Address Division of Epidemiology and Biostatistics  
34 School of Public Health & Family Medicine  
35 University of Cape Town Faculty of Health Sciences  
36 Anzio Road, Observatory  
37 Cape Town 7925, South Africa  
38 Email: [landon.myer@uct.ac.za](mailto:landon.myer@uct.ac.za)  
39 Tel: +27 21 406 6661  
40  
41  
42  
43  
44  
45  
46  
47  
48  
49  
50  
51  
52  
53  
54  
55  
56  
57  
58  
59  
60

## ABSTRACT

**Objectives:** Prevention of unplanned pregnancy is a crucial aspect of preventing mother-to-child HIV transmission (PMTCT). There are few data investigating how HIV status and use of antiretroviral therapy (ART) influences pregnancy planning in high HIV burden settings. Our objective was to examine the prevalence and determinants of unplanned pregnancy among HIV-positive and HIV-negative women in Cape Town, South Africa.

**Design:** Cross-sectional analysis.

**Settings:** Single primary-level antenatal care clinic in Cape Town, South Africa.

**Participants:** HIV-positive and -negative pregnant women, booking for antenatal care from March 2013 - August 2015, were included.

**Main Outcome measures:** Unplanned pregnancy was measured at the first antenatal care visit using the London Measure of Unplanned Pregnancy (LMUP). Analyses examined LMUP scores across four groups of participants defined by their HIV status, awareness of their HIV status prior to the current pregnancy, and/or whether they were using ART prior to the current pregnancy.

**Results:** Among 2105 pregnant women (1512 HIV-positive; 593 HIV-negative), median age was 28 years, 43% were married/co-habiting and 20% were nulliparous. Levels of unplanned pregnancy were significantly higher in HIV-positive versus HIV-negative women (50% vs. 33%,  $p < 0.001$ ); and highest in women who were known HIV-positive but not on ART (53%). After adjusting for age, parity and marital status, the odds of unplanned pregnancy were greatest among women newly diagnosed and women who were known HIV-positive but not on ART (compared to HIV-negative women, adjusted odds ratio [aOR]: 1.43; 95% confidence interval [CI]: 1.06-1.94 and aOR: 1.57; 95% CI: 1.14-2.16, respectively). Increased parity and younger age (<24years) were also associated with unplanned pregnancy (aOR: 1.42; 95% CI: 1.25-1.60 and aOR: 1.84; 95% CI: 1.23-2.75, respectively).

**Conclusions:** We observed high levels of unplanned pregnancy, particularly among HIV-positive women not on ART, suggesting ongoing missed opportunities for improved family planning and counselling services for HIV-positive women.

### Strengths and limitations of this study:

- One of the first studies to examine pregnancy intentions by HIV status and antiretroviral therapy use utilizing a relatively large cross-sectional sample of participants including an HIV-negative comparator group.
- Employed a robust pregnancy intention instrument fairly new to our setting which performed well in comparison to an existing measure.
- Although the findings of this study is largely representative of existing sexual and reproductive practices within the country, it may not be generalizable to other resource-limited settings.
- Self-reported pregnancy intentions after pregnancy recognition and entering antenatal care, may have increased acceptance of the pregnancy and resulted in over reporting of planned pregnancy.

## INTRODUCTION

Efforts to eliminate mother-to-child transmission of HIV (MTCT) continue to escalate globally, with unprecedented numbers of HIV-infected pregnant women receiving triple drug antiretroviral therapy (ART) during pregnancy and breastfeeding.<sup>1</sup> These advances in prevention of mother-to-child transmission (PMTCT) services have led to significant reductions in the number of new paediatric infections across resource-limited settings including Africa.<sup>1</sup> South Africa has the highest number of individuals living with HIV worldwide with up to 18.8% prevalence among women of child-bearing age.<sup>2</sup> HIV prevalence is particularly high among pregnant women, with almost 30% of those seeking antenatal care (ANC) testing HIV-positive nationally.<sup>3</sup> Despite the substantial efforts of current PMTCT programmes, MTCT remains a major driving force of the country's HIV epidemic and in turn, an ongoing concern.<sup>4</sup>

Even where ART is widely available to pregnant and breastfeeding women, the timing and intention of a pregnancy may be important indirect risk factors for MTCT.<sup>5 6</sup> Unplanned pregnancies predict maternal health behaviours during pregnancy and in the postpartum period, including late presentation for ANC, reduced ART adherence and suboptimal breastfeeding practices.<sup>6-9</sup> Preventing unplanned pregnancies among HIV-positive women through addressing the unmet need for family planning is a relatively low-cost, effective method for preventing new paediatric HIV infections.<sup>10 11 12</sup>

Around the world, 40% of all pregnancies are estimated to be unplanned. In comparison, 55-65% of pregnancies among HIV-positive women may be unplanned.<sup>13</sup> However, the current evidence for the association between HIV status, ART use and unplanned pregnancy remains inconsistent.<sup>14-16</sup> While some previous studies documented higher levels of unplanned pregnancies among HIV-positive compared to HIV-negative women,<sup>17</sup> others found no association between HIV status and unplanned pregnancy.<sup>18-20</sup> Further, women who are not aware of their HIV status prior to conception may be more likely to have an unplanned pregnancy.<sup>19</sup> In contrast, there is also some evidence to suggest that women recently initiating ART may be more likely to experience an unplanned pregnancy.<sup>15 21 22</sup> There are few robust data on pregnancy planning among HIV-positive women initiating ART in the current era of PMTCT.

1  
2 In this context, there is a clear need for further insights into pregnancy planning and  
3 associated factors among HIV-positive women in high burden settings. To address this, we  
4 examined the prevalence and determinants of unplanned pregnancy among HIV-positive and  
5 HIV-negative women in Cape Town, South Africa.  
6  
7  
8  
9

## 10 11 12 **METHODS**

### 13 14 15 **Study setting and design**

16 This cross-sectional analysis utilized data obtained from the enrolment visit of the MCH-  
17 ART (Maternal-Child Health Antiretroviral Therapy) study, a multicomponent  
18 implementation science study investigating optimal strategies for delivering ART services to  
19 HIV-positive pregnant and postpartum women (ClinicalTrials.gov NCT01933477). The study  
20 took place in the community of Gugulethu, a historically disadvantaged community with a  
21 high burden of HIV. The MCH-ART study methods have been described in detail  
22 previously.<sup>23</sup> Briefly, HIV-positive pregnant women above 18 years of age were  
23 consecutively enrolled at their first ANC visit. In addition, this analysis utilized data from a  
24 parallel sub-study to MCH-ART, the HIV-unexposed, uninfected (HU2) study which enrolled  
25 HIV-negative women attending their first ANC visit, to provide a comparison group.<sup>23</sup>  
26  
27  
28  
29  
30  
31  
32  
33  
34

### 35 36 **Ethical considerations**

37 The MCH-ART and HU2 studies were approved by the University of Cape Town's Faculty  
38 of Health Sciences Human Research Ethics Committee and the Institutional Review Board of  
39 Columbia University. All participants provided a written informed consent prior to  
40 participation in both studies.  
41  
42  
43  
44  
45  
46

### 47 48 **Data collection**

49 Following enrolment at their first ANC visit, all participants completed a structured  
50 interviewer-administered questionnaire in their language of choice - isiXhosa or English.  
51 Information collected included basic socio-demographic characteristics, medical history,  
52 pregnancy intentions and contraceptive use. All measures were translated into isiXhosa, and  
53 back-translated into English by a second translator, to ensure accuracy.  
54  
55  
56  
57  
58  
59  
60

1  
2  
3  
4 Contraceptive use was defined as any contraceptive method used in the 12 months prior to  
5 pregnancy recognition. A categorical variable was created for socio-economic status (SES)  
6 based on employment status, highest level of education, housing type and number of  
7 amenities in the household, and was categorized into quartiles. Pregnancy intentions were  
8 assessed using a validated 6-item questionnaire, the London Measure of Unplanned  
9 Pregnancy (LMUP). This instrument asked women to report the circumstances of their most  
10 recent pregnancy, with each item in the tool scored 0, 1 or 2 according to published scoring  
11 guidelines (LMUP analysis guidance paper).<sup>24</sup> Women's scores were summed across all 6  
12 items, resulting in a total score from 0-12 with each point increase representing an increase in  
13 pregnancy intention. Total LMUP scores were divided into categories of pregnancy  
14 intentions: unplanned (0-3), ambivalent (4-9) and planned (10-12), based on the scoring used  
15 in the original development of the scale.<sup>24</sup> A separate single item, three level response  
16 question (Current pregnancy intended: Yes, No, Unsure) was used to examine the  
17 performance of the LMUP.  
18  
19  
20  
21  
22  
23  
24  
25  
26  
27  
28

### 29 **Statistical analysis**

30  
31  
32 Statistical analyses were performed using STATA version 12.0 (Stata Corporation, College  
33 Station, Texas, USA). In this analysis, participants were categorized into four groups based  
34 on routine public sector HIV testing at entry into ANC, and self-reported ART use: (1)  
35 known HIV-positive and established on ART, (2) known HIV-positive but not on ART, (3)  
36 newly diagnosed HIV-positive during the current pregnancy, and (4) HIV-negative, used as  
37 the reference category. Socio-demographic characteristics at enrolment were compared across  
38 these four groups. Cronbach's  $\alpha$  was used to assess the reliability of the isiXhosa translated  
39 LMUP in this context, and bivariate analysis using a  $\chi^2$  test compared the isiXhosa LMUP to  
40 the single three-level response question. Associations between characteristics at enrollment  
41 and unplanned pregnancy were explored using  $\chi^2$  and Fisher's exact tests for categorical, and  
42 Wilcoxon rank-sum tests for continuous variables. A multivariable logistic regression model  
43 was built to examine independent predictors of unplanned pregnancy, with maternal age and  
44 SES considered as *a priori* confounders. Model fit was explored using Akaike's information  
45 criterion (AIC). For the logistic regression analysis, LMUP scores were dichotomized into  
46 unplanned/ ambivalent (LMUP score 0-9) versus planned pregnancy (LMUP score 10-12).  
47  
48  
49  
50  
51  
52  
53  
54  
55  
56  
57  
58  
59  
60



## RESULTS

A total of 2105 women (1512 HIV-positive and 593 HIV-negative), enrolled between March 2013 and August 2015, were included in this analysis. The median age of participants was 28 [inter-quartile range (IQR) 24-33] years, 29% had completed high school, 61% were unemployed and 43% were married or cohabiting. Across all groups, 20% were nulliparous (Table 1). Among the overall group of HIV-positive women, 37% were on ART at entry into ANC, 29% were not on ART but previously diagnosed with HIV, and 34% were newly diagnosed. Compared to HIV-negative women, HIV-positive women as a group were slightly older, less likely to be employed and more likely to live in informal housing. Among the HIV-infected women, those who were newly diagnosed were more likely to be younger, have completed high school and less likely to be married/co-habiting.

Overall, 69% of women reported using at least one contraceptive method in the 12 months prior to pregnancy recognition. HIV-positive women on ART and HIV-negative women were more likely to report using a contraceptive method than those who were HIV-positive not on ART or newly diagnosed (74% and 74%, versus 65% and 63%,  $p < 0.001$ ). Injectable hormonal contraceptives were the most common contraceptive methods used by both HIV-positive and HIV-negative women, followed by condom use; hormonal injections were more commonly reported by HIV-negative women.

The LMUP performed well (Cronbach's  $\alpha$ : 0.84), with similar levels of internal consistency across HIV status. The LMUP performed well in comparison to the  $\chi^2$  test assessing the single item three level response question on pregnancy intention: 99% of women who had an unplanned pregnancy based on LMUP score also reported unplanned pregnancies based on the three level response question; 91% of women classified as having a planned pregnancy by the LMUP score responded similarly to the three level response question ( $p < 0.001$ ; Table 2). Item-rest correlations were  $\geq 0.7$  for all items of the LMUP.

The median LMUP score in the total sample was 4 (IQR 3-10; Figure 1). Nearly half (46%) of all pregnancies were unplanned (LMUP score: 0-3); 29% of women had ambivalent pregnancy intentions (LMUP score: 4-9); and 25% had a planned pregnancy (LMUP score: 10-12). Compared to HIV-positive women, fewer HIV-negative women experienced an unplanned pregnancy (33% vs. 50%,  $p < 0.001$ ). Across the four comparison groups, the

1  
2 highest level of unplanned pregnancy was observed in women who were HIV-positive not on  
3 ART while HIV-negative women were the least likely to report an unplanned pregnancy  
4 (54% vs.33%,  $p<0.001$ ; Figure 2).  
5  
6  
7

8  
9 Women with planned pregnancies were older and more likely to be married/co-habiting.  
10 Among those with an unplanned pregnancy, 75% (721/959) reported using at least one  
11 contraceptive method in the year prior to pregnancy recognition, compared to 58% (257/539)  
12 of those reporting a planned pregnancy. Women who had discussed family planning with  
13 their partner in the past year, and HIV-positive women who had disclosed their HIV status to  
14 their male partner, were less likely to have an unplanned pregnancy (Table 3).  
15  
16  
17  
18

19  
20 In a multivariable logistic regression model adjusted for age, parity, relationship status and  
21 SES, unplanned pregnancy was associated with HIV-ART status. Compared to HIV-negative  
22 women, HIV-positive women not receiving ART were most likely to have an unplanned  
23 pregnancy [adjusted odds ratio (AOR): 1.57; 95% confidence interval (CI): 1.14-2.16],  
24 followed by women newly diagnosed with HIV (AOR: 1.43; 95% CI: 1.06-1.94). There were  
25 no apparent differences in unplanned pregnancy between HIV-negative and HIV-positive  
26 women established on ART. Unplanned pregnancy was also associated with increasing  
27 parity (AOR 1.42; 95% CI: 1.25-1.61) and younger age (compared to 35-44 years of age: 18-  
28 24 years, AOR 1.84; 95% CI: 1.23-2.75; 25-34 years, AOR 1.29; 95% CI 0.95-1.75). Recent  
29 contraceptive use and marital status (married/co-habiting) reduced the odds of unplanned  
30 pregnancy.  
31  
32  
33  
34  
35  
36  
37  
38  
39

## 40 DISCUSSION

41  
42 This study provides valuable insights into unplanned pregnancy among HIV-positive and  
43 HIV-negative women in peri-urban South Africa. Nearly half (46%) of all pregnancies in this  
44 sample were reported as unplanned, evidence that levels of unplanned pregnancy remain  
45 unacceptably high in South Africa.<sup>15 18</sup> Of note, levels of unplanned pregnancy were  
46 considerably higher among HIV-positive compared to HIV-negative women, particularly  
47 among those HIV-positive women not on ART. Contraceptive use mirrored these results,  
48 with the lowest levels of use reported among HIV-positive women newly diagnosed or  
49 previously diagnosed but not using ART.  
50  
51  
52  
53  
54  
55  
56  
57  
58  
59  
60

1  
2 This study is one of the first to examine pregnancy intentions by HIV status and ART use in  
3 South Africa. The finding that levels of unplanned pregnancy may be higher among HIV-  
4 positive compared to HIV-negative women has been previously documented in other African  
5 countries<sup>18-20</sup> as well as in high-income countries,<sup>14 16</sup> but has not been previously  
6 documented in this high burden setting. Although previous research has demonstrated slightly  
7 higher levels of unplanned pregnancy among HIV-positive women on ART,<sup>15 25</sup> the current  
8 study adds to the evidence base that women who were not aware of their HIV status prior to  
9 conception and those HIV-positive not on ART may be more likely to have an unplanned  
10 pregnancy.<sup>19</sup> The lower prevalence of unplanned pregnancy observed among ART users  
11 compared to those not yet on ART could potentially be linked to the family planning services  
12 received by HIV-positive women engaged in care. However, one-third of women were only  
13 diagnosed HIV-positive at their first ANC visit, highlighting possible missed opportunities  
14 for HIV diagnosis before pregnancy. Our finding that unplanned pregnancy is associated with  
15 younger age, increasing parity and contraceptive use in the year prior to conception is  
16 consistent with previous research.<sup>21 26 27</sup>

17  
18  
19  
20  
21  
22  
23  
24  
25  
26  
27  
28  
29 Reported use of contraceptives prior to unplanned pregnancy was high across all groups,  
30 similar to findings from a study conducted in Swaziland,<sup>20</sup> and may have resulted in women  
31 being more likely to consider their pregnancy unplanned. The high level of unplanned  
32 pregnancy despite high uptake of contraceptives could potentially be linked to high  
33 contraceptive failure rates, incorrect use or poor adherence to short-acting methods,  
34 presenting an opportunity for improving family planning services. Levels and methods of  
35 contraceptive use differed slightly by HIV status, with use of hormonal injections more  
36 frequently reported by HIV-negative women. Similar to our findings, previous studies in  
37 Southern Africa have shown that uptake of long-acting contraceptive methods such as  
38 intrauterine devices and hormonal implants among HIV-positive women is relatively low,  
39 possibly due to low availability of these options and poorly integrated reproductive health  
40 and HIV services.<sup>15 28 29</sup>

41  
42  
43  
44  
45  
46  
47  
48  
49  
50  
51 While this study focused on women, the involvement of male partners and education around  
52 family planning and prevention of unplanned pregnancy also requires attention. Our results  
53 illustrate that women who were married or living with their male partners, those who had  
54 discussed family planning with their partners before conception and HIV-positive women  
55 who had disclosed their HIV status to their partners were less likely to have an unplanned  
56  
57  
58  
59  
60

1  
2 pregnancy. Similar results from other studies have shown that male partners' attitudes  
3 towards contraception impact strongly on pregnancy planning and contraceptive use among  
4 both HIV-positive and HIV-negative women in other settings.<sup>29</sup>  
5  
6  
7

8  
9 Finally, this study is one of the first to examine the validity of the LMUP within a low- and  
10 middle-income country setting in Africa. The translated LMUP proved to be a reliable  
11 measure of pregnancy intention in this sample, similar to results obtained from other  
12 validation studies conducted in Malawi and South Africa.<sup>30, 31</sup> The LMUP is therefore  
13 recommended for use in research across similar settings in South Africa.  
14  
15  
16  
17

18  
19 This study has some limitations. The cross-sectional design means that causal associations  
20 could not be examined and the significance of some of the predictors identified needs to be  
21 further explored using longitudinal studies. This study was specific to a single setting in  
22 South Africa and although it is largely representative of existing sexual and reproductive  
23 practices within the country, further research is needed in other resource-limited settings. As  
24 women were asked to report on pregnancy intentions after pregnancy recognition and  
25 entering ANC, acceptance of the pregnancy during this time may have resulted in over  
26 reporting of planned pregnancy. In contrast, women who terminated their pregnancy without  
27 presenting for ANC were not included in this study; therefore, the prevalence of unplanned  
28 pregnancy may have been underestimated. Finally, as contraceptive use was assessed only as  
29 any use of a contraceptive method in the 12 months prior to pregnancy recognition, our data  
30 are not robust to assess consistent contraceptive use during this time.  
31  
32  
33  
34  
35  
36  
37  
38  
39

40  
41 Despite some limitations, this study is notable and presents key differences between HIV-  
42 positive and HIV-negative women regarding pregnancy intentions and family planning  
43 practices. It is evident from our findings that HIV-positive women regardless of ART use  
44 require additional support to avoid unplanned pregnancy. While further research is required,  
45 young, HIV-positive women and those with previous pregnancies may be particularly  
46 vulnerable. Moreover, our results suggest that HIV-negative women also require improved  
47 engagement in reproductive health services for HIV testing and prevention, as well as family  
48 planning services. There is an urgent need to empower all women in this context with  
49 appropriate and effective tools to prevent unplanned pregnancies. Focused and innovative  
50 interventions may be required to improve women's understanding of various options for  
51 effective family planning.  
52  
53  
54  
55  
56  
57  
58  
59  
60

**AUTHOR AFFILIATIONS:**

1. Division of Epidemiology & Biostatistics, School of Public Health & Family Medicine, University of Cape Town, Cape Town, South Africa
2. Centre for Infectious Disease Epidemiology & Research, School of Public Health & Family Medicine, University of Cape Town, Cape Town, South Africa
3. Anova Health Institute, Johannesburg, South Africa
4. ICAP, Columbia University, Mailman School of Public Health, New York, USA
5. Department of Obstetrics & Gynaecology, University of Cape Town & New Somerset Hospital, Cape Town, South Africa
6. College of Physicians & Surgeons, Columbia University, New York, USA

**ACKNOWLEDGEMENTS:**

The authors wish to thank all members of the research team who made data collection for this analysis possible, as well as all the women who consented to participate in the studies from which these data were obtained.

**FUNDING:**

This work was supported by the President's Emergency Plan for AIDS Relief through the National Institute of Child Health and Human Development, Grant 1R01HD074558. Additional funding comes from the Elizabeth Glaser Pediatric AIDS Foundation, the South African Medical Research Council, the Fogarty Foundation (NIH Fogarty International Center Grant #5R25TW009340), and the Office of AIDS Research.

**COMPETING INTERESTS:**

The authors have no competing interests to declare.

**ETHICS APPROVAL:**

Human Research Ethics Committee of the University of Cape Town, Faculty of Health Sciences and the Columbia University Medical Centre Institutional Review Board.

**CONTRIBUTORS:**

EJA and LM conceptualized the study. TKP, SLR and AZ directed data collection. VI conducted the analysis, led data interpretation and drafted the manuscript, with critical inputs

1  
2 from KB, TKP, SLR, JAM, AZ, GP, EJA and LM. All authors read and approved the final  
3 manuscript to be published.  
4

5  
6  
7 **DATA SHARING STATEMENT**

8  
9 No additional data are available.  
10  
11  
12  
13  
14  
15  
16  
17  
18  
19  
20  
21  
22  
23  
24  
25  
26  
27  
28  
29  
30  
31  
32  
33  
34  
35  
36  
37  
38  
39  
40  
41  
42  
43  
44  
45  
46  
47  
48  
49  
50  
51  
52  
53  
54  
55  
56  
57  
58  
59  
60

For peer review only

## REFERENCES

1. UNAIDS. Global AIDS update 2016. Geneva: UNIADS 2016.
2. Shisana O, Rehle T, Simbayi L, et al. South African national HIV prevalence, incidence and behaviour survey, 2012.
3. The National Antenatal Sentinel HIV Prevalence Survey, South Africa, 2013, National Department of Health.
4. Bhardwaj S, Treger-Slavin L, Barron P, et al. Elimination of mother-to-child transmission of HIV in South Africa: rapid scale-up using quality improvement: prevention of mother-to-child transmission-Progress towards the Millennium Development Goals. *South African Medical Journal* 2014;104(3):239-43.
5. Joyce T, Kaestner R, Korenman S. The stability of pregnancy intentions and pregnancy-related maternal behaviors. *Maternal and Child Health Journal* 2000;4(3):171-78.
6. Mohllajee AP, Curtis KM, Morrow B, et al. Pregnancy intention and its relationship to birth and maternal outcomes. *Obstetrics & Gynecology* 2007;109(3):678-86.
7. Gipson JD, Koenig MA, Hindin MJ. The effects of unintended pregnancy on infant, child, and parental health: a review of the literature. *Studies in family planning* 2008;39(1):18-38.
8. Kost K, Landry DJ, Darroch JE. Predicting maternal behaviors during pregnancy: does intention status matter? *Family planning perspectives* 1998:79-88.
9. Wado YD, Afework MF, Hindin MJ. Unintended pregnancies and the use of maternal health services in southwestern Ethiopia. *BMC international health and human rights* 2013;13(1):36.
10. World Health Organization. PMTCT strategic vision 2010-2015: preventing mother-to-child transmission of HIV to reach the UNGASS and Millennium Development Goals: World health Organization 2010.
11. Reynolds H, Janowitz B, Wilcher R, et al. Contraception to prevent HIV-positive births: current contribution and potential cost savings in PEPFAR countries. *Sexually transmitted infections* 2008;84(Suppl 2):ii49-ii53.
12. Reynolds HW, Janowitz B, Homan R, et al. The value of contraception to prevent perinatal HIV transmission. *Sexually transmitted diseases* 2006;33(6):350-56.
13. Sedgh G, Singh S, Hussain R. Intended and Unintended Pregnancies Worldwide in 2012 and Recent Trends. *Studies in family planning* 2014;45(3):301-14
14. Loutfy M, Raboud J, Wong J, et al. High prevalence of unintended pregnancies in HIV-positive women of reproductive age in Ontario, Canada: a retrospective study. *HIV medicine* 2012;13(2):107-17.

15. Schwartz SR, Rees H, Mehta S, et al. High incidence of unplanned pregnancy after antiretroviral therapy initiation: findings from a prospective cohort study in South Africa. *PLoS one* 2012;7(4):e36039.
16. Sutton MY, Patel R, Frazier EL. Unplanned pregnancies among HIV-infected women in care—United States. *JAIDS Journal of Acquired Immune Deficiency Syndromes* 2014;65(3):350-58.
17. McCoy SI, Buzdugan R, Ralph LJ, et al. Unmet need for family planning, contraceptive failure, and unintended pregnancy among HIV-infected and HIV-uninfected women in Zimbabwe. *PLoS One* 2014;9(8):e105320.
18. Credé S, Hoke T, Constant D, et al. Factors impacting knowledge and use of long acting and permanent contraceptive methods by postpartum HIV positive and negative women in Cape Town, South Africa: a cross-sectional study. *BMC Public Health* 2012;12(1):197.
19. Mayondi GK, Wirth K, Morroni C, et al. Unintended pregnancy, contraceptive use, and childbearing desires among HIV-infected and HIV-uninfected women in Botswana: across-sectional study. *BMC public health* 2016;16(1):44.
20. Warren CE, Abuya T, Askew I. Family planning practices and pregnancy intentions among HIV-positive and HIV-negative postpartum women in Swaziland: a cross sectional survey. *BMC pregnancy and childbirth* 2013;13(1):150.
21. Kikuchi K, Wakasugi N, Poudel KC, et al. High rate of unintended pregnancies after knowing of HIV infection among HIV positive women under antiretroviral treatment in Kigali, Rwanda. *Bioscience trends* 2011;5(6):255-63.
22. Myer L, Morroni C, Rebe K. Prevalence and determinants of fertility intentions of HIV-infected women and men receiving antiretroviral therapy in South Africa. *AIDS patient care and STDs* 2007;21(4):278-85.
23. Myer L, Phillips TK, Zerbe A, et al. Optimizing antiretroviral therapy (ART) for maternal and child health (MCH): rationale and design of the MCH-ART study. *Journal of Acquired Immune Deficiency Syndromes (1999)* 2016;72(Suppl 2):S189.
24. Barrett G, Smith SC, Wellings K. Conceptualisation, development, and evaluation of a measure of unplanned pregnancy. *Journal of epidemiology and community health* 2004;58(5):426-33.
25. Bello B, Kielkowski D, Heederik D, et al. Time-to-pregnancy and pregnancy outcomes in a South African population. *BMC public health* 2010;10(1):565.
26. Oulman E, Kim TH, Yunis K, et al. Prevalence and predictors of unintended pregnancy among women: an analysis of the Canadian Maternity Experiences Survey. *BMC pregnancy and childbirth* 2015;15(1):260.
27. Raifman J, Chetty T, Tanser F, et al. Preventing unintended pregnancy and HIV transmission: effects of the HIV treatment cascade on contraceptive use and choice



1  
2  
3 in rural KwaZulu-Natal. *JAIDS Journal of Acquired Immune Deficiency Syndromes*  
4 2014;67:S218-S27.  
5

- 6 28. Cooper D, Harries J, Myer L, et al. "Life is still going on": Reproductive intentions  
7 among HIV-positive women and men in South Africa. *Social science & medicine*  
8 2007;65(2):274-83.  
9
- 10 29. Wall KM, Haddad L, Vwalika B, et al. Unintended pregnancy among HIV positive  
11 couples receiving integrated HIV counseling, testing, and family planning services  
12 in Zambia. *PloS one* 2013;8(9):e75353.  
13
- 14 30. Hall J, Barrett G, Mbwana N, et al. Understanding pregnancy planning in a low-  
15 income country setting: validation of the London measure of unplanned pregnancy  
16 in Malawi. *BMC pregnancy and childbirth* 2013;13(1):200.  
17
- 18 31. Ernstoff E. Understanding pregnancy intention in the Southern African setting:  
19 validation of the London measure of unplanned pregnancy in the Cape Town area,  
20 South Africa. University of Cape Town, 2016.  
21  
22  
23  
24  
25  
26  
27  
28  
29  
30  
31  
32  
33  
34  
35  
36  
37  
38  
39  
40  
41  
42  
43  
44  
45  
46  
47  
48  
49  
50  
51  
52  
53  
54  
55  
56  
57  
58  
59  
60

Table 1: *Demographic characteristics of women booking for antenatal care by HIV status and antiretroviral treatment*

| Women's characteristics                                 | Total<br>(N=2105) | Known HIV+<br>on ART<br>(N=556) | Known HIV+<br>Not on ART<br>(N=444) | Newly<br>Diagnosed<br>(N=512) | HIV-Negative<br>(N=2105) | P-value* |
|---------------------------------------------------------|-------------------|---------------------------------|-------------------------------------|-------------------------------|--------------------------|----------|
| Age, years                                              | 28 (24-33)        | 31 (28-34)                      | 29 (26-32)                          | 26 (22-30)                    | 27 (23-32)               |          |
| Age Category                                            |                   |                                 |                                     |                               |                          |          |
| 18-24                                                   | 532 (25)          | 51 (9)                          | 77 (17)                             | 187 (37)                      | 217 (37)                 | <0.001   |
| 25-34                                                   | 1235 (59)         | 368 (66)                        | 307 (69)                            | 276 (54)                      | 284 (48)                 |          |
| 35-44                                                   | 338 (16)          | 137 (25)                        | 60 (14)                             | 49 (9)                        | 92 (15)                  |          |
| Parity                                                  | 1 (1-2)           | 2 (1-2)                         | 2 (1-2)                             | 1 (0-2)                       | 1 (0-2)                  | <0.001   |
| Completed High School                                   | 601 (29)          | 109 (20)                        | 103 (23)                            | 359 (70)                      | 236 (40)                 | <0.001   |
| Employment Status                                       |                   |                                 |                                     |                               |                          |          |
| Employed                                                | 833 (39)          | 210 (38)                        | 144 (32)                            | 200 (39)                      | 275 (46)                 | <0.001   |
| Housing                                                 |                   |                                 |                                     |                               |                          |          |
| Informal                                                | 1100 (52)         | 318 (57)                        | 236 (53)                            | 270 (53)                      | 276 (47)                 | 0.005    |
| Socioeconomic Status (SES)                              |                   |                                 |                                     |                               |                          |          |
| Low                                                     | 524 (25)          | 166 (30)                        | 132 (30)                            | 139 (27)                      | 87 (15)                  |          |
| Low-Moderate                                            | 469 (22)          | 134 (24)                        | 103 (23)                            | 108 (21)                      | 124 (21)                 |          |
| Moderate-High                                           | 565 (27)          | 164 (30)                        | 116 (26)                            | 127 (25)                      | 158 (27)                 |          |
| High                                                    | 541 (26)          | 92 (16)                         | 93 (21)                             | 138 (27)                      | 218 (37)                 |          |
| Married/Cohabiting                                      | 882 (43)          | 258 (47)                        | 200 (47)                            | 180 (36)                      | 244 (42)                 | <0.001   |
| Disclosed HIV Status to Current Partner                 | 816 (55)          | 462 (84)                        | 289 (67)                            | 65 (13)                       | NA                       | <0.001   |
| Single item question - Current Pregnancy Intention      |                   |                                 |                                     |                               |                          |          |
| Unintended                                              | 1347 (64)         | 310 (56)                        | 291 (66)                            | 343 (67)                      | 403 (68)                 | <0.001   |
| Intended                                                | 752 (36)          | 244 (44)                        | 152 (34)                            | 167 (33)                      | 189 (32)                 |          |
| Unsure                                                  | 5 (0)             | 2 (0)                           | 1 (0)                               | 2 (0)                         | 0 (0)                    |          |
| Used Contraceptives in Past 12 Months                   | 1459 (69)         | 414 (74)                        | 287 (65)                            | 320 (63)                      | 438 (74)                 | <0.001   |
| Contraceptive Method Used in Past 12 Months             |                   |                                 |                                     |                               |                          |          |
| None                                                    | 646 (31)          | 142 (26)                        | 157 (36)                            | 192 (38)                      | 155 (26)                 | <0.001   |
| Oral Contraceptive                                      | 57 (3)            | 5 (1)                           | 8 (2)                               | 12 (3)                        | 32 (5)                   |          |
| Injectable                                              | 752 (36)          | 152 (27)                        | 139 (31)                            | 155 (30)                      | 306 (52)                 |          |
| IUD                                                     | 8 (0)             | 0                               | 2                                   | 2 (0)                         | 4 (1)                    |          |
| Sterilization                                           | 1 (0)             | 0                               | 0                                   | 0                             | 1 (0)                    |          |
| Condom                                                  | 641 (30)          | 257 (46)                        | 138 (31)                            | 151 (29)                      | 95 (16)                  |          |
| Discussed Family Planning with Partner in Past 12months | 964 (49)          | 275 (54)                        | 198 (49)                            | 235 (50)                      | 256 (44)                 | 0.006    |

Note: Values are given as number (percentage) or median (interquartile range)

Abbreviations: HIV+, HIV positive; HIV-, HIV negative; ART, Antiretroviral therapy; IQR, inter-quartile range

\*Chi-square or Fisher's exact tests were used to assess bivariate associations

Table 2: *The London Measure of Unplanned Pregnancy intention scores in comparison with the single item on pregnancy intentions*

| Single item - Pregnancy Intention | London Measure of Unplanned Pregnancy |                      |                       |                    |
|-----------------------------------|---------------------------------------|----------------------|-----------------------|--------------------|
|                                   | Total<br>(N=2105)                     | Unplanned<br>(N=959) | Ambivalent<br>(N=607) | Planned<br>(N=539) |
| No                                | 1347 (64)                             | <b>950 (99)</b>      | 346 (57)              | 51 (9)             |
| Yes                               | 752 (36)                              | 8 (1)                | 256 (42)              | <b>488 (91)</b>    |
| Unsure                            | 5 (0)                                 | 0 (0)                | <b>5 (1)</b>          | 0 (0)              |

Note: Values are given as number (percentage)

Table 3: Demographic characteristics of participants by the London Measure of Unplanned Pregnancy intention categories

| Women's Characteristics                                 | Total<br>(N=2105) | Unplanned<br>(N=959) | Ambivalent<br>(N=607) | Planned<br>(N=539) | P-value* |
|---------------------------------------------------------|-------------------|----------------------|-----------------------|--------------------|----------|
| Age, years                                              | 28 (24-33)        | 28 (24-32)           | 28 (25-33)            | 29 (25-33)         | <0.001   |
| Age Category                                            |                   |                      |                       |                    |          |
| 18-24                                                   | 532 (25)          | 274 (29)             | 150 (25)              | 108 (20)           |          |
| 25-34                                                   | 1235 (59)         | 548 (57)             | 356 (59)              | 331 (61)           | 0.004    |
| 35-44                                                   | 338 (16)          | 137 (14)             | 101 (17)              | 100 (19)           |          |
| Parity, Median                                          | 1 (1-2)           | 1 (1-2)              | 1 (1-2)               | 1 (1-2)            | <0.001   |
| Completed High School                                   |                   |                      |                       |                    |          |
| Yes                                                     | 601 (29)          | 236 (25)             | 205 (34)              | 160 (30)           | <0.001   |
| Level of Education                                      |                   |                      |                       |                    |          |
| Primary                                                 | 73 (3)            | 38 (4)               | 16 (3)                | 19 (3)             |          |
| Secondary                                               | 1973 (94)         | 889 (93)             | 574 (94)              | 510 (95)           | 0.309    |
| Tertiary                                                | 59 (3)            | 32 (3)               | 17 (3)                | 10 (2)             |          |
| Employment Status                                       |                   |                      |                       |                    |          |
| Employed                                                | 833 (39)          | 352 (37)             | 265 (44)              | 212 (39)           | 0.022    |
| Housing                                                 |                   |                      |                       |                    |          |
| Informal                                                | 1100 (52)         | 476 (50)             | 307 (51)              | 317 (59)           | 0.002    |
| Socio-economic Status                                   |                   |                      |                       |                    |          |
| Low                                                     | 524 (25)          | 274 (29)             | 118 (19)              | 132 (25)           |          |
| Low-Moderate                                            | 469 (22)          | 195 (20)             | 143 (24)              | 131 (24)           | 0.004    |
| Moderate-High                                           | 565 (27)          | 251 (26)             | 167 (28)              | 147 (27)           |          |
| High                                                    | 541 (26)          | 238 (25)             | 175 (29)              | 128 (24)           |          |
| Married/Cohabiting                                      |                   |                      |                       |                    |          |
| Yes                                                     | 882 (43)          | 273 (30)             | 242 (40)              | 367 (69)           | <0.001   |
| Disclosed HIV Status to Current Partner (HIV+ Women)    | 816 (55)          | 367 (50)             | 214 (56)              | 235 (64)           | <0.001   |
| Intention of Current Pregnancy                          |                   |                      |                       |                    |          |
| Unintended                                              | 1347 (64)         | 950 (99)             | 346 (57)              | 51 (9)             |          |
| Intended                                                | 752 (36)          | 8 (1)                | 256 (42)              | 488 (91)           | <0.001   |
| Unsure                                                  | 5 (0)             | 0 (0)                | 5 (1)                 | 0 (0)              |          |
| Used Contraceptive in Past 12 Months                    | 1459 (69)         | 721 (75)             | 427 (70)              | 311 (58)           | <0.001   |
| Contraceptive Method Used in Past 12 Months             |                   |                      |                       |                    |          |
| None                                                    | 646 (31)          | 238 (25)             | 180 (30)              | 228 (42)           |          |
| Oral Contraceptive                                      | 57 (3)            | 26 (3)               | 16 (3)                | 15 (3)             |          |
| Injectable                                              | 752 (36)          | 335 (35)             | 233 (38)              | 184 (34)           | <0.001   |
| IUD                                                     | 8 (0)             | 4 (0)                | 2 (0)                 | 2 (0)              |          |
| Sterilization                                           | 1 (0)             | 0 (0)                | 1 (0)                 | 0 (0)              |          |
| Condom                                                  | 641 (30)          | 356 (37)             | 175 (29)              | 110 (20)           |          |
| Discussed Family Planning with Partner in Past 12months | 964 (49)          | 234 (26)             | 347 (60)              | 383 (78)           | <0.001   |

Note: Values are given as number (percentage) or median (interquartile range)

\*Chi-square or Fisher's exact tests were used to assess bivariate associations

Table 4: *Multivariable logistic regression model of determinants of unplanned pregnancy among HIV-positive and HIV-negative women*

| Variables                            | Univariate analysis |             |         | Multivariate analysis |           |         |
|--------------------------------------|---------------------|-------------|---------|-----------------------|-----------|---------|
|                                      | OR                  | 95% CI      | p-value | AOR                   | 95% CI    | p-value |
| HIV Status and ART Use               |                     |             |         |                       |           |         |
| HIV Negative                         |                     |             |         |                       |           |         |
| Newly Diagnosed                      | 1.36                | 1.03-1.78   | 0.028   | 1.43                  | 1.06-1.94 | 0.020   |
| Known HIV+ - No ART                  | 1.44                | 1.08-1.92   | 0.013   | 1.57                  | 1.14-2.16 | 0.006   |
| Known HIV+ - On ART                  | 1.04                | 0.80-1.34   | 0.766   | 1.10                  | 0.82-1.48 | 0.513   |
| Age Category                         |                     |             |         |                       |           |         |
| 35-44                                |                     |             |         |                       |           |         |
| 25-34                                | 1.15                | 0.88 - 1.49 | 0.309   | 1.29                  | 0.95-1.75 | 0.099   |
| 18-24                                | 1.65                | 1.20-2.26   | 0.002   | 1.84                  | 1.23-2.75 | 0.003   |
| Parity                               | 1.07                | 0.98-1.17   | 0.136   | 1.42                  | 1.25-1.61 | 0.000   |
| Married/Cohabiting                   |                     |             |         |                       |           |         |
| No                                   |                     |             |         |                       |           |         |
| Yes                                  | 0.23                | 0.19- 0.29  | 0.000   | 0.20                  | 0.15-0.25 | 0.000   |
| Used Contraceptive in Past 12 Months |                     |             |         |                       |           |         |
| No                                   |                     |             |         |                       |           |         |
| Yes                                  | 0.73                | 0.59-0.91   | 0.005   | 1.94                  | 1.55-2.43 | 0.000   |
| Socioeconomic Status                 |                     |             |         |                       |           |         |
| Low                                  |                     |             |         |                       |           |         |
| Low-Middle                           | 0.87                | 0.65-1.15   | 0.329   | 1.80                  | 0.58-1.09 | 0.151   |
| Middle-High                          | 0.96                | 0.73-1.26   | 0.755   | 0.74                  | 0.56-1.01 | 0.054   |
| High                                 | 1.09                | 0.82-1.44   | 0.561   | 0.84                  | 0.61-1.16 | 0.301   |
| Finished High School                 |                     |             |         |                       |           |         |
| No                                   |                     |             |         |                       |           |         |
| Yes                                  | 0.93                | 0.75-1.15   | 0.499   | -                     | -         | -       |
| Employed                             |                     |             |         |                       |           |         |
| No                                   |                     |             |         |                       |           |         |
| Yes                                  | 1.00                | 0.8-1.22    | 0.994   | -                     | -         | -       |
| Housing                              |                     |             |         |                       |           |         |
| Informal                             |                     |             |         |                       |           |         |
| Formal                               | 1.42                | 1.17-1.73   | 0.000   | -                     | -         | -       |
| Gravidity                            | 1.06                | 0.97-1.16   | 0.201   | -                     | -         | -       |

**Abbreviations:** OR, Odds ratio; AOR, Adjusted Odds ratio; CI, Confidence interval

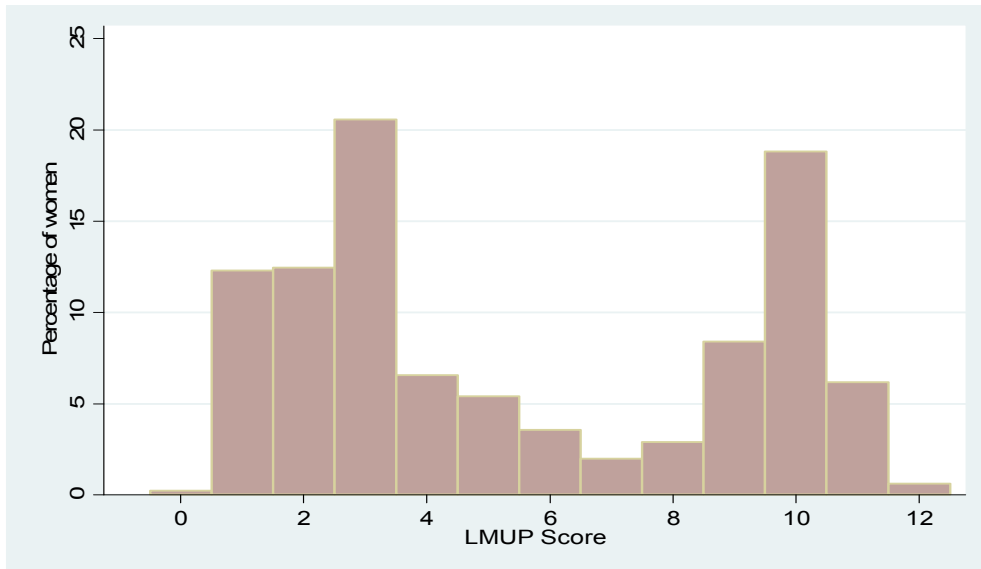

Figure 1: The distribution of the London Measure of Unplanned Pregnancy scores for all women

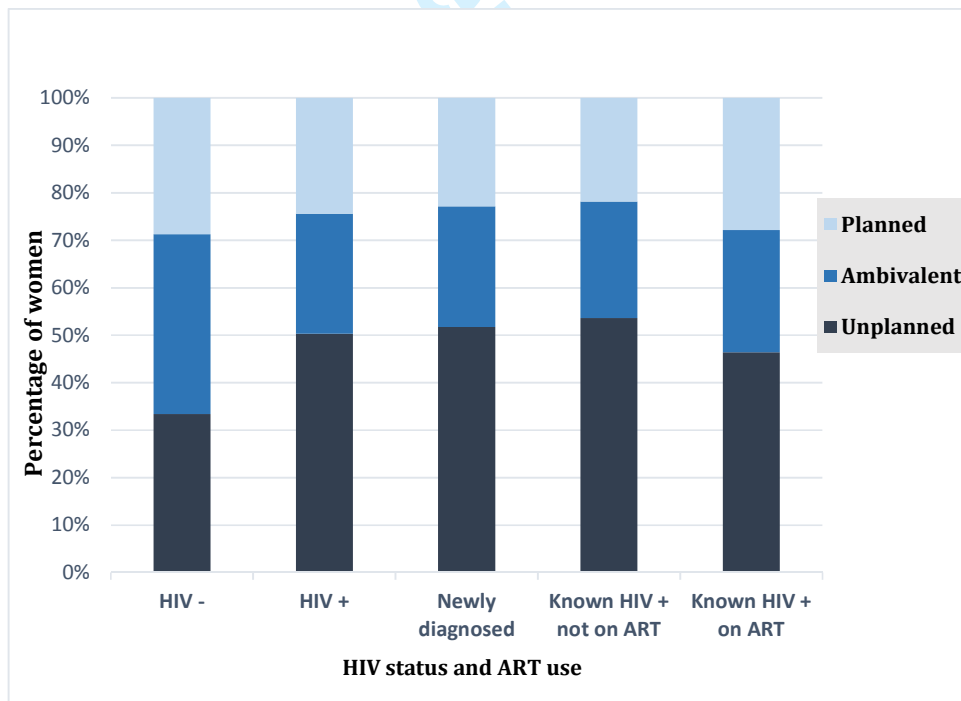

Figure 2: The London Measure of Unplanned Pregnancy score categories by HIV status and antiretroviral therapy use

# BMJ Open

## Prevalence and determinants of unplanned pregnancy in HIV-positive and HIV-negative pregnant women in Cape Town, South Africa: a cross-sectional study

|                                 |                                                                                                                                                                                                                                                                                                                                                                                                                                                                                                                                                                                                                                                                                                                                                                                                                                                                                                                                                                                                                                                                                                                                                                                                                                                                                                                                                                                                                                                                                                                                                                                                                                                                                                                                                                                                                                 |
|---------------------------------|---------------------------------------------------------------------------------------------------------------------------------------------------------------------------------------------------------------------------------------------------------------------------------------------------------------------------------------------------------------------------------------------------------------------------------------------------------------------------------------------------------------------------------------------------------------------------------------------------------------------------------------------------------------------------------------------------------------------------------------------------------------------------------------------------------------------------------------------------------------------------------------------------------------------------------------------------------------------------------------------------------------------------------------------------------------------------------------------------------------------------------------------------------------------------------------------------------------------------------------------------------------------------------------------------------------------------------------------------------------------------------------------------------------------------------------------------------------------------------------------------------------------------------------------------------------------------------------------------------------------------------------------------------------------------------------------------------------------------------------------------------------------------------------------------------------------------------|
| Journal:                        | <i>BMJ Open</i>                                                                                                                                                                                                                                                                                                                                                                                                                                                                                                                                                                                                                                                                                                                                                                                                                                                                                                                                                                                                                                                                                                                                                                                                                                                                                                                                                                                                                                                                                                                                                                                                                                                                                                                                                                                                                 |
| Manuscript ID                   | bmjopen-2017-019979.R1                                                                                                                                                                                                                                                                                                                                                                                                                                                                                                                                                                                                                                                                                                                                                                                                                                                                                                                                                                                                                                                                                                                                                                                                                                                                                                                                                                                                                                                                                                                                                                                                                                                                                                                                                                                                          |
| Article Type:                   | Research                                                                                                                                                                                                                                                                                                                                                                                                                                                                                                                                                                                                                                                                                                                                                                                                                                                                                                                                                                                                                                                                                                                                                                                                                                                                                                                                                                                                                                                                                                                                                                                                                                                                                                                                                                                                                        |
| Date Submitted by the Author:   | 22-Dec-2017                                                                                                                                                                                                                                                                                                                                                                                                                                                                                                                                                                                                                                                                                                                                                                                                                                                                                                                                                                                                                                                                                                                                                                                                                                                                                                                                                                                                                                                                                                                                                                                                                                                                                                                                                                                                                     |
| Complete List of Authors:       | <p>Iyun, Victoria; University of Cape Town, Division of Epidemiology &amp; Biostatistics, School of Public health and Family Medicine; University of Cape Town, Centre for Infectious Disease Epidemiology &amp; Research, School of Public Health &amp; Family Medicine</p> <p>Brittain, Kirsty ; University of Cape Town, Division of Epidemiology &amp; Biostatistics, School of Public Health &amp; Family Medicine; University of Cape Town, Centre for Infectious Disease Epidemiology &amp; Research, School of Public Health and Family Medicine</p> <p>Phillips, Tamsin; University of Cape Town, Division of Epidemiology &amp; Biostatistics, School of Public Health &amp; Family Medicine; University of Cape Town, Centre for Infectious Disease Epidemiology &amp; Research, School of Public health and Family Medicine</p> <p>le Roux, Stanzi; University of Cape Town, Division of Epidemiology &amp; Biostatistics, School of Public health and Family Medicine</p> <p>McIntyre, James; University of Cape Town, Division of Epidemiology &amp; Biostatistics, School of Public health and Family Medicine; Anova Health Institute</p> <p>Zerbe, A; Columbia University, ICAP at Columbia, Mailman School of Public Health</p> <p>Petro, Greg; University of Cape Town, Department of Obstetrics &amp; Gynaecology; New Somerset Hospital</p> <p>Abrams, Elaine; Columbia University, ICAP at Columbia, Mailman School of Public Health; Columbia University, College of Physicians &amp; Surgeons</p> <p>Myer, Landon; University of Cape Town, Division of Epidemiology &amp; Biostatistics, School of Public Health &amp; Family Medicine, University of Cape Town; University of Cape Town, Centre for Infectious Disease Epidemiology &amp; Research, School of Public Health &amp; Family Medicine</p> |
| <b>Primary Subject Heading</b>: | Public health                                                                                                                                                                                                                                                                                                                                                                                                                                                                                                                                                                                                                                                                                                                                                                                                                                                                                                                                                                                                                                                                                                                                                                                                                                                                                                                                                                                                                                                                                                                                                                                                                                                                                                                                                                                                                   |
| Secondary Subject Heading:      | Infectious diseases, Epidemiology, HIV/AIDS, Sexual health                                                                                                                                                                                                                                                                                                                                                                                                                                                                                                                                                                                                                                                                                                                                                                                                                                                                                                                                                                                                                                                                                                                                                                                                                                                                                                                                                                                                                                                                                                                                                                                                                                                                                                                                                                      |
| Keywords:                       | unplanned pregnancy, contraception, family planning, HIV, women                                                                                                                                                                                                                                                                                                                                                                                                                                                                                                                                                                                                                                                                                                                                                                                                                                                                                                                                                                                                                                                                                                                                                                                                                                                                                                                                                                                                                                                                                                                                                                                                                                                                                                                                                                 |
|                                 |                                                                                                                                                                                                                                                                                                                                                                                                                                                                                                                                                                                                                                                                                                                                                                                                                                                                                                                                                                                                                                                                                                                                                                                                                                                                                                                                                                                                                                                                                                                                                                                                                                                                                                                                                                                                                                 |

1  
2  
3  
4  
5  
6  
7  
8  
9  
10  
11  
12  
13  
14  
15  
16  
17  
18  
19  
20  
21  
22  
23  
24  
25  
26  
27  
28  
29  
30  
31  
32  
33  
34  
35  
36  
37  
38  
39  
40  
41  
42  
43  
44  
45  
46  
47  
48  
49  
50  
51  
52  
53  
54  
55  
56  
57  
58  
59  
60

SCHOLARONE™  
Manuscripts

For peer review only

1  
2  
3 Title

4 **Prevalence and determinants of unplanned pregnancy in HIV-positive and HIV-**  
5 **negative pregnant women in Cape Town, South Africa: a cross-sectional study**  
6  
7

8 Short title

9 *Unplanned pregnancy among HIV-positive and HIV-negative pregnant women in South*  
10 *Africa*  
11  
12

13 Authors

14 Victoria Iyun<sup>1,2</sup>, Kirsty Brittain<sup>1,2</sup>, Tamsin K. Phillips<sup>1,2</sup>, Stanzi le Roux<sup>1</sup>, James A.  
15 McIntyre<sup>1,3</sup>, Allison Zerbe<sup>4</sup>, Greg Petro<sup>5</sup>, Elaine J. Abrams<sup>4,6</sup>, Landon Myer<sup>1,2\*</sup>  
16  
17

- 18 1. Division of Epidemiology & Biostatistics, School of Public Health & Family Medicine,  
19 University of Cape Town, Cape Town, South Africa
- 20 2. Centre for Infectious Disease Epidemiology & Research, School of Public Health &  
21 Family Medicine, University of Cape Town, Cape Town, South Africa
- 22 3. Anova Health Institute, Johannesburg, South Africa
- 23 4. ICAP at Columbia, Mailman School of Public Health, Columbia University, New York,  
24 USA
- 25 5. Department of Obstetrics & Gynaecology, University of Cape Town & New Somerset  
26 Hospital, Cape Town, South Africa
- 27 6. College of Physicians & Surgeons, Columbia University, New York, USA
- 28  
29

30 \*Corresponding author:  
31

32 Address Division of Epidemiology and Biostatistics  
33 School of Public Health & Family Medicine  
34 University of Cape Town Faculty of Health Sciences  
35 Anzio Road, Observatory  
36 Cape Town 7925, South Africa  
37 Email: [landon.myer@uct.ac.za](mailto:landon.myer@uct.ac.za)  
38 Tel: +27 21 406 6661  
39  
40  
41  
42  
43  
44  
45  
46  
47  
48  
49  
50  
51  
52  
53  
54  
55  
56  
57  
58  
59  
60



## ABSTRACT

**Objectives:** Prevention of unplanned pregnancy is a crucial aspect of preventing mother-to-child HIV transmission (PMTCT). There are few data investigating how HIV status and use of antiretroviral therapy (ART) influences pregnancy planning in high HIV burden settings. Our objective was to examine the prevalence and determinants of unplanned pregnancy among HIV-positive and HIV-negative women in Cape Town, South Africa.

**Design:** Cross-sectional analysis.

**Settings:** Single primary-level antenatal care clinic in Cape Town, South Africa.

**Participants:** HIV-positive and -negative pregnant women, booking for antenatal care from March 2013 - August 2015, were included.

**Main Outcome measures:** Unplanned pregnancy was measured at the first antenatal care visit using the London Measure of Unplanned Pregnancy (LMUP). Analyses examined LMUP scores across four groups of participants defined by their HIV status, awareness of their HIV status prior to the current pregnancy, and/or whether they were using ART prior to the current pregnancy.

**Results:** Among 2105 pregnant women (1512 HIV-positive; 593 HIV-negative), median age was 28 years, 43% were married/co-habiting and 20% were nulliparous. Levels of unplanned pregnancy were significantly higher in HIV-positive versus HIV-negative women (50% vs. 33%,  $p < 0.001$ ); and highest in women who were known HIV-positive but not on ART (53%). After adjusting for age, parity and marital status, unplanned pregnancy was most common among women newly diagnosed and women who were known HIV-positive but not on ART (compared to HIV-negative women, adjusted odds ratio [aOR]: 1.43; 95% confidence interval [CI]: 1.05-1.94 and aOR: 1.57; 95% CI: 1.13-2.15, respectively). Increased parity and younger age (<24years) were also associated with unplanned pregnancy (aOR: 1.42; 95% CI: 1.25-1.60 and aOR: 1.83; 95% CI: 1.23-2.74, respectively).

**Conclusions:** We observed high levels of unplanned pregnancy, particularly among HIV-positive women not on ART, suggesting ongoing missed opportunities for improved family planning and counselling services for HIV-positive women.

### Strengths and limitations of this study:

- This is one of the first studies to examine pregnancy intentions in a large sample of HIV-positive and negative women aged (18-44) in South Africa.
- This study utilized a robust pregnancy intention instrument fairly new to our study setting; the London Measure of Unplanned Pregnancy, to measure levels of unplanned pregnancy.
- The cross-sectional design means that causal associations of unplanned pregnancy could not be determined.
- This study included participants based on convenience sampling from a single urban setting, therefore findings may not be generalizable to other resource-limited settings.
- Our retrospective self-reported measurement of pregnancy intentions after pregnancy recognition and entering antenatal care, may have increased acceptance of the pregnancy and resulted in over reporting of planned pregnancy.

## INTRODUCTION

Efforts to eliminate mother-to-child transmission of HIV (MTCT) continue to escalate globally and advances in prevention of mother-to-child transmission (PMTCT) services have led to significant reductions in the number of new paediatric infections across resource-limited settings including Africa.<sup>1</sup> In South Africa, over 95% of HIV-infected pregnant women receive triple drug antiretroviral therapy (ART) during pregnancy and breastfeeding and the rate of MTCT declined from 8% in 2008 to 1.3 % in 2016.<sup>1 2</sup>

South Africa has the highest number of individuals living with HIV worldwide with up to 18.8% prevalence among women of child-bearing age.<sup>3</sup> HIV prevalence is particularly high among pregnant women, with almost 30% of those seeking antenatal care (ANC) testing HIV-positive nationally.<sup>4</sup> Despite the substantial efforts of national PMTCT programmes in high-burden countries, new paediatric infections remains a major public health concern.<sup>2 5</sup>

Even where ART is widely available to pregnant and breastfeeding women, the timing and planning of a pregnancy may be important determinants of MTCT.<sup>6 7</sup> Unplanned pregnancies predict maternal health behaviours during pregnancy and in the postpartum period, including late presentation for ANC, reduced ART adherence and suboptimal breastfeeding practices.<sup>7-10</sup> Preventing unplanned pregnancies among HIV-positive women through addressing the unmet need for family planning is a relatively low-cost, effective method for preventing new paediatric HIV infections.<sup>11 12 13</sup> Contraceptive use is high in South Africa with an estimated 65% of sexually active women using at least one method and studies have shown an association between contraception and pregnancy intentions.<sup>14 15</sup> Modern contraceptive methods are freely available at public sector health care facilities in South Africa with short acting methods—primarily injectable contraceptives being the most commonly used by sexually active women in South Africa.<sup>16</sup>

An estimated 40% of all pregnancies worldwide and 35% of pregnancies in Africa are unplanned.<sup>17</sup> In comparison, 35-65% of pregnancies among HIV-positive women across sub-Saharan Africa may be unplanned,<sup>18-21</sup> with up to two-thirds of HIV-positive women reporting unplanned pregnancies in South Africa.<sup>14 22</sup> However, the current evidence for the association between HIV status, ART use and unplanned pregnancy remains inconsistent.<sup>23</sup> While some previous studies documented higher levels of unplanned pregnancies among

1  
2 HIV-positive compared to HIV-negative women,<sup>20</sup> others found no association between HIV  
3 status and unplanned pregnancy.<sup>24 25</sup>  
4  
5

6  
7 Women who are not aware of their HIV status prior to conception may be more likely to have  
8 an unplanned pregnancy. Findings from a recent study in Botswana demonstrated an almost  
9 2-fold increase in the likelihood of unplanned pregnancy among women unaware of their  
10 HIV-positive serostatus prior to conception compared to those who were aware.<sup>19</sup> In contrast,  
11 there is also some evidence to suggest that pregnancy incidence is significantly higher for  
12 women after ART initiation compared to those not on ART, and approximately 60% of HIV-  
13 positive women on ART experience an unplanned pregnancy.<sup>18 22 26</sup> There are few robust  
14 data on pregnancy planning among HIV-positive women initiating ART in the current era of  
15 PMTCT. In this context, there is a clear need for further insights into pregnancy planning and  
16 associated factors among HIV-positive women in high burden settings. To address this, we  
17 examined the prevalence and determinants of unplanned pregnancy among HIV-positive and  
18 HIV-negative women in Cape Town, South Africa.  
19  
20  
21  
22  
23  
24  
25

## 26 27 **METHODS**

### 28 29 30 **Study setting and design**

31  
32 This cross-sectional analysis utilized data obtained from the enrolment visit of the MCH-  
33 ART (Maternal-Child Health Antiretroviral Therapy) study, a multicomponent  
34 implementation science study investigating optimal strategies for delivering ART services to  
35 HIV-positive pregnant and postpartum women (ClinicalTrials.gov NCT01933477). The study  
36 took place in the community of Gugulethu, a historically disadvantaged community with a  
37 high burden of HIV. The MCH-ART study methods have been described in detail  
38 previously.<sup>27</sup> Briefly, 1554 HIV-positive pregnant women above 18 years of age were  
39 consecutively enrolled at their first ANC visit. In addition, this analysis utilized data from a  
40 parallel sub-study to MCH-ART, the HIV-unexposed, uninfected (HU2) study which enrolled  
41 612 HIV-negative women attending their first ANC visit, to provide a comparison group.<sup>27</sup>  
42 For this analysis we restricted the sample to 1512 HIV-positive women and 593 HIV-  
43 negative women who had complete data on pregnancy planning.  
44  
45  
46  
47  
48  
49  
50  
51  
52

### 53 **Ethical considerations**

54 The MCH-ART and HU2 studies were approved by the University of Cape Town's Faculty  
55 of Health Sciences Human Research Ethics Committee and the Institutional Review Board of  
56  
57  
58  
59  
60

1  
2 Columbia University. All participants provided a written informed consent prior to  
3 participation in both studies.  
4  
5

### 6 7 **Data collection**

8  
9  
10 Following enrolment at their first ANC visit, all participants completed a structured  
11 interviewer-administered questionnaire in their language of choice - isiXhosa or English.  
12 Information collected included basic socio-demographic characteristics, medical history,  
13 pregnancy intentions and contraceptive use. All measures were translated into isiXhosa, and  
14 back-translated into English by a second translator, to ensure accuracy.  
15  
16  
17

18  
19  
20 Contraceptive use was defined as any contraceptive method used in the 12 months prior to  
21 pregnancy recognition. A categorical variable was created for socio-economic status (SES)  
22 based on employment status, years of education, housing type and number of amenities in the  
23 household, and was categorized into quartiles.<sup>28</sup> Pregnancy intentions were assessed using a  
24 validated 6-item questionnaire, the London Measure of Unplanned Pregnancy (LMUP). This  
25 instrument asked women to report the circumstances of their most recent pregnancy, with  
26 each item in the tool scored 0, 1 or 2 according to published scoring guidelines (LMUP  
27 analysis guidance paper).<sup>29</sup> Women's scores were summed across all 6 items, resulting in a  
28 total score from 0-12 with each point increase representing an increase in pregnancy  
29 intention. Total LMUP scores were divided into categories of pregnancy intentions:  
30 unplanned (0-3), ambivalent (4-9) and planned (10-12), based on the scoring used in the  
31 original development of the scale.<sup>29</sup> A separate single item, three level response question  
32 (Current pregnancy intended: Yes, No, Unsure) was used to examine the performance of the  
33 LMUP.  
34  
35  
36  
37  
38  
39  
40  
41  
42  
43

### 44 **Statistical analysis**

45  
46  
47 Statistical analyses were performed using STATA version 12.0 (Stata Corporation, College  
48 Station, Texas, USA). In this analysis, participants were categorized into four groups based  
49 on routine public sector HIV testing at entry into ANC, and self-reported ART use: (1)  
50 known HIV-positive and established on ART, (2) known HIV-positive but not on ART, (3)  
51 newly diagnosed HIV-positive during the current pregnancy, and (4) HIV-negative, used as  
52 the reference category. Socio-demographic characteristics at enrolment were compared across  
53  
54  
55  
56  
57

1 these four groups. Cronbach's  $\alpha$  was used to assess the reliability of the isiXhosa translated  
2 LMUP in this context, and bivariate analysis using a  $\chi^2$  test compared the isiXhosa LMUP to  
3 the single three-level response question. Associations between characteristics at enrollment  
4 and unplanned pregnancy were explored using  $\chi^2$  and Fisher's exact tests for categorical, and  
5 Wilcoxon rank-sum tests for continuous variables. A multivariable logistic regression model  
6 was built to examine independent predictors of unplanned pregnancy, with maternal age and  
7 SES considered as *a priori* confounders. Model fit was explored using Akaike's information  
8 criterion (AIC) and *a priori* hypothesis about confounders namely age and SES. For the log-  
9 binomial regression analysis, LMUP scores were dichotomized into unplanned/ ambivalent  
10 (LMUP score 0-9) versus planned pregnancy (LMUP score 10-12).

## 19 RESULTS

20 A total of 2105 women (1512 HIV-positive and 593 HIV-negative), enrolled between March  
21 2013 and August 2015, were included in this analysis. The median age of participants was 28  
22 [inter-quartile range (IQR) 24-33] years, 29% had completed high school, 61% were  
23 unemployed and 43% were married or cohabiting. Across all groups, 20% were nulliparous  
24 (Table 1). Among the overall group of HIV-positive women, 37% were on ART at entry into  
25 ANC, 29% were not on ART but previously diagnosed with HIV, and 34% were newly  
26 diagnosed. Compared to HIV-negative women, HIV-positive women as a group were slightly  
27 older, less likely to be employed and more likely to live in informal housing. Among the  
28 HIV-infected women, those who were newly diagnosed were more likely to be younger, have  
29 completed high school and less likely to be married/co-habiting.

30 Overall, 69% of women reported using at least one contraceptive method in the 12 months  
31 prior to pregnancy recognition. HIV-positive women on ART and HIV-negative women were  
32 more likely to report using a contraceptive method than those who were HIV-positive not on  
33 ART or newly diagnosed (74% and 74%, versus 65% and 63%,  $p < 0.001$ ). Injectable  
34 hormonal contraceptives were the most common contraceptive methods used by both HIV-  
35 positive and HIV-negative women, followed by condom use; hormonal injections were more  
36 commonly reported by HIV-negative women.

37 The LMUP performed well (Cronbach's  $\alpha$ : 0.84), with similar levels of internal consistency  
38 across HIV status. The LMUP performed well in comparison to the  $\chi^2$  test assessing the

1  
2 single item three level response question on pregnancy intention: 99% of women who had an  
3 unplanned pregnancy based on LMUP score also reported unplanned pregnancies based on  
4 the three level response question; 91% of women classified as having a planned pregnancy by  
5 the LMUP score responded similarly to the three level response question ( $p < 0.001$ ; Table 2).  
6  
7 Item-rest correlations were  $\geq 0.7$  for all items of the LMUP.  
8  
9

10  
11 The median LMUP score in the total sample was 4 (IQR 3-10; Figure 1). Nearly half (46%)  
12 of all pregnancies were unplanned (LMUP score: 0-3); 29% of women had ambivalent  
13 pregnancy intentions (LMUP score: 4-9); and 25% had a planned pregnancy (LMUP score:  
14 10-12). Compared to HIV-positive women, fewer HIV-negative women experienced an  
15 unplanned pregnancy (33% vs. 50%,  $p < 0.001$ ). Across the four comparison groups, the  
16 highest level of unplanned pregnancy was observed in women who were HIV-positive not on  
17 ART while HIV-negative women were the least likely to report an unplanned pregnancy  
18 (54% vs. 33%,  $p < 0.001$ ; Figure 2).  
19  
20  
21  
22  
23  
24  
25

26 Women with planned pregnancies were older and more likely to be married/co-habiting.  
27 Among those with an unplanned pregnancy, 75% (721/959) reported using at least one  
28 contraceptive method in the year prior to pregnancy recognition, compared to 58% (257/539)  
29 of those reporting a planned pregnancy. Women who had discussed family planning with  
30 their partner in the past year, and HIV-positive women who had disclosed their HIV status to  
31 their male partner, were less likely to have an unplanned pregnancy (Table 3).  
32  
33  
34  
35  
36  
37

38 In a multivariable log-binomial regression model adjusted for age, parity, relationship status  
39 and SES, unplanned pregnancy was associated with HIV-ART status. Compared to HIV-  
40 negative women, HIV-positive women not receiving ART were most likely to have an  
41 unplanned pregnancy [adjusted odds ratio (aOR): 1.57; 95% confidence interval (CI): 1.13-  
42 2.15], followed by women newly diagnosed with HIV (aOR: 1.43; 95% CI: 1.05-1.94). There  
43 were no apparent differences in unplanned pregnancy between HIV-negative and HIV-  
44 positive women established on ART. Unplanned pregnancy was also associated with  
45 increasing parity (aOR 1.42; 95% CI: 1.25-1.60) and younger age (compared to 35-44 years  
46 of age: 18-24 years, aOR 1.83; 95% CI: 1.23-2.74; 25-34 years, aOR 1.29; 95% CI 0.95-1.75)  
47 (Table 4). Recent contraceptive use and marital status (married/co-habiting) reduced the odds  
48 of unplanned pregnancy.  
49  
50  
51  
52  
53  
54  
55  
56  
57  
58  
59  
60

1  
2 Including individual proxy measures of SES (employment, education and home type) in the  
3 adjusted model did not change our main findings. The adjusted odds ratio of an unplanned  
4 pregnancy with individual proxy measures of SES (compared to HIV negative women) was  
5 aOR 1.43; 95% CI: 1.05-1.94 in newly diagnosed HIV-positive women, 1.56; 95% CI: 1.13-  
6 2.15 for previously diagnosed HIV positive women not on ART and 1.10 95% CI 0.82-1.47  
7 for previously diagnosed HIV positive women on ART. In comparison, SES was included as  
8 a composite measure, the adjusted odds ratio of an unplanned pregnancy (compared to HIV  
9 negative women) aOR 1.43; 95% CI: 1.05-1.94 in newly diagnosed HIV-positive women,  
10 1.56; 95% CI: 1.13-2.15 for previously diagnosed women not on ART and 1.10; 95% CI:  
11 0.82-1.47 for previously diagnosed HIV positive women on ART).

## 12 **DISCUSSION**

13  
14  
15  
16  
17  
18  
19  
20  
21  
22  
23 This study provides valuable insights into unplanned pregnancy among HIV-positive and  
24 HIV-negative women in peri-urban South Africa. Similar to high levels of approximately 56-  
25 60% of unplanned pregnancy previously reported in South Africa, nearly half (46%) of all  
26 pregnancies in this study were reported as unplanned, evidence that levels of unplanned  
27 pregnancy remain unacceptably high in South Africa.<sup>14 22</sup> Of note, levels of unplanned  
28 pregnancy were considerably higher among HIV-positive compared to HIV-negative women,  
29 particularly among those HIV-positive women not on ART. Contraceptive use mirrored these  
30 results, with the lowest levels of use reported among HIV-positive women newly diagnosed  
31 or previously diagnosed but not using ART.

32  
33  
34  
35  
36  
37  
38  
39  
40  
41  
42  
43  
44  
45  
46  
47  
48  
49  
50  
51  
52  
53  
54  
55  
56  
57  
58  
59  
60  
This study is one of the first to examine pregnancy intentions by HIV status and ART use in  
South Africa. The finding that levels of unplanned pregnancy may be higher among HIV-  
positive compared to HIV-negative women has been previously documented in other African  
countries as well as in high-income countries,<sup>24 25</sup> but has not been previously documented in  
this high burden setting. Although previous research across sub-Saharan Africa has  
demonstrated slightly higher levels of unplanned pregnancy reaching up to 62% among HIV-  
positive women,<sup>14 19 21</sup> the current study provides additional evidence that women who were  
not aware of their HIV status prior to conception and those HIV-positive not on ART may be  
more likely to have an unplanned pregnancy.<sup>19</sup> The lower prevalence of unplanned pregnancy  
observed among ART users compared to those not yet on ART could potentially be linked to  
the family planning services received by HIV-positive women engaged in care. However,

1  
2 one-third of women were only diagnosed HIV-positive at their first ANC visit, highlighting  
3 possible missed opportunities for HIV diagnosis before pregnancy. Our finding that  
4 unplanned pregnancy is associated with younger age, increasing parity and contraceptive use  
5 in the year prior to conception is consistent with previous research.<sup>18 30 31</sup> One study found  
6 that HIV-positive Rwandan women with two or more children were four times more likely to  
7 have an unplanned pregnancy,<sup>18</sup> while evidence from a study Botswana and Swaziland  
8 demonstrated that younger age (<20 years old) and low level of education (not beyond high  
9 school) were associated with an increased odds of an unplanned pregnancy.<sup>19 21</sup> Similar  
10 findings were reported from a high income country.<sup>31</sup> Supporting our findings of high  
11 unplanned pregnancy levels despite high uptake of contraceptives, a South African study  
12 found up to 62% of unplanned pregnancy despite high contraceptive uptake of 89% among  
13 HIV positive and negative women.<sup>14</sup>  
14  
15  
16  
17  
18  
19  
20  
21  
22

23 Reported use of contraceptives prior to unplanned pregnancy was high across all groups,  
24 similar to findings from a study conducted in Swaziland,<sup>32</sup> and may have resulted in women  
25 being more likely to consider their pregnancy unplanned. The high level of unplanned  
26 pregnancy despite high uptake of contraceptives in our study population could potentially be  
27 linked to high contraceptive failure rates, incorrect use or poor adherence to short-acting  
28 methods, presenting an opportunity for improving family planning services. The high levels of  
29 unplanned pregnancy observed among newly diagnosed HIV positive women and HIV  
30 positive women not on ART suggests a potential difference in risk factors, specifically poorer  
31 health seeking behaviours compared to HIV-positive women who have engaged with the  
32 health care facility and are on ART.<sup>8 30 10</sup> Women on ART have also been shown to be twice  
33 as likely to use contraceptive methods compared to HIV-negative women.<sup>15</sup> Even among  
34 HIV positive women on ART in this study who routinely receive family planning services  
35 alongside HIV care services, unplanned pregnancy rate was considerably high. Levels and  
36 methods of contraceptive use differed slightly by HIV status, with use of hormonal injections  
37 more frequently reported by HIV-negative women. Similar to our findings, previous studies  
38 in Southern Africa have shown that uptake of long-acting contraceptive methods such as  
39 intrauterine devices and hormonal implants among HIV-positive women is relatively low,  
40 possibly due to low availability of these options and poorly integrated reproductive health  
41 and HIV services.<sup>22 33 34</sup> In addition, there is a high reliance on injectable hormonal  
42 contraceptives in South Africa which may be because this method is routinely offered at no  
43 cost, after delivery in most public health sector facilities, reflecting the general contraceptive  
44  
45  
46  
47  
48  
49  
50  
51  
52  
53  
54  
55  
56  
57  
58  
59  
60



1  
2 method use patterns across the country.<sup>35</sup> Similar to findings from this study, uptake of  
3  
4 contraceptives is generally high (65%) however, uptake of efficient long-acting contraceptive  
5  
6 methods has been shown to be relatively low, with majority of women relying on the male  
7  
8 condom.<sup>36 15</sup> A study conducted in Cape Town found that only 6% of 538 HIV-positive and  
9  
10 negative women used long acting and permanent contraceptive methods and this finding was  
11  
12 mainly driven by poor knowledge of more efficient long acting and permanent contraceptive  
13  
14 methods. Choice of contraceptive method was primarily based on health care provider  
15  
16 recommendations and convenience.<sup>35</sup>

17  
18 While this study focused on women, the involvement of male partners and education around  
19  
20 family planning and prevention of unplanned pregnancy also requires attention. Our results  
21  
22 illustrate that women who were married or living with their male partners, those who had  
23  
24 discussed family planning with their partners before conception and HIV-positive women  
25  
26 who had disclosed their HIV status to their partners, were less likely to have an unplanned  
27  
28 pregnancy. Similar results from other studies have shown that male partners' attitudes  
29  
30 towards contraception impact strongly on pregnancy planning and contraceptive use among  
31  
32 both HIV-positive and HIV-negative women in other settings.<sup>34</sup>

33  
34 Finally, this study is one of the first to examine the validity of the LMUP within a low- and  
35  
36 middle-income country setting in Africa. The translated LMUP proved to be a reliable  
37  
38 measure of pregnancy intention in this sample, similar to results obtained from another  
39  
40 validation study conducted in Malawi.<sup>37</sup> The LMUP is therefore recommended for use in  
41  
42 research across similar settings in South Africa.

43  
44 This study has some limitations. The cross-sectional design means that causal associations  
45  
46 could not be examined and the significance of some of the predictors identified needs to be  
47  
48 further explored using longitudinal studies. This study was specific to a single urban setting  
49  
50 in South Africa and although it may be representative of existing knowledge of contraceptive  
51  
52 methods, uptake and method preference within similar settings across the country,<sup>35 36</sup> further  
53  
54 research is needed in other countries. As women were asked to report on pregnancy  
55  
56 intentions after pregnancy recognition and entering ANC, acceptance of the pregnancy during  
57  
58 this time may have resulted in over reporting of planned pregnancy. In contrast, women who  
59  
60 terminated their pregnancy without presenting for ANC were not included in this study;  
therefore, the prevalence of unplanned pregnancy may have been underestimated. Finally, as

1  
2 contraceptive use was assessed only as any use of a contraceptive method in the 12 months  
3 prior to pregnancy recognition, our data are not robust to assess consistent contraceptive use  
4 during this time.  
5  
6

7  
8 Despite some limitations, this study is notable and presents key differences between HIV-  
9 positive and HIV-negative women regarding pregnancy intentions and family planning  
10 practices. It is evident from our findings that HIV-positive women regardless of ART use  
11 require additional support to avoid unplanned pregnancy. While further research is required,  
12 young, HIV-positive women and those with previous pregnancies may be particularly  
13 vulnerable. Moreover, our results suggest that HIV-negative women also require improved  
14 engagement in reproductive health services for HIV testing and prevention, as well as family  
15 planning services. There is an urgent need to empower all women in this context with  
16 appropriate and effective tools to prevent unplanned pregnancies. Focused and innovative  
17 interventions may be required to improve women's understanding of various options for  
18 effective family planning.  
19  
20  
21  
22  
23  
24  
25  
26  
27

#### 28 **AUTHOR AFFILIATIONS:**

- 29 1. Division of Epidemiology & Biostatistics, School of Public Health & Family Medicine,  
30 University of Cape Town, Cape Town, South Africa
  - 31 2. Centre for Infectious Disease Epidemiology & Research, School of Public Health &  
32 Family Medicine, University of Cape Town, Cape Town, South Africa
  - 33 3. Anova Health Institute, Johannesburg, South Africa
  - 34 4. ICAP, Columbia University, Mailman School of Public Health, New York, USA
  - 35 5. Department of Obstetrics & Gynaecology, University of Cape Town & New Somerset  
36 Hospital, Cape Town, South Africa
  - 37 6. College of Physicians & Surgeons, Columbia University, New York, USA
- 38  
39  
40  
41  
42  
43  
44  
45

#### 46 **ACKNOWLEDGEMENTS:**

47 The authors wish to thank all members of the research team who made data collection for this  
48 analysis possible, as well as all the women who consented to participate in the studies from  
49 which these data were obtained.  
50  
51  
52  
53

#### 54 **FUNDING:**

55  
56  
57  
58  
59  
60

1  
2 This work was supported by the President's Emergency Plan for AIDS Relief through the  
3 National Institute of Child Health and Human Development, Grant 1R01HD074558.  
4 Additional funding comes from the Elizabeth Glaser Pediatric AIDS Foundation, the South  
5 African Medical Research Council, the Fogarty Foundation (NIH Fogarty International  
6 Center Grant #5R25TW009340), and the Office of AIDS Research.  
7  
8  
9

#### 10 **COMPETING INTERESTS:**

11 The authors have no competing interests to declare.  
12  
13  
14

#### 15 **ETHICS APPROVAL:**

16 Human Research Ethics Committee of the University of Cape Town, Faculty of Health  
17 Sciences and the Columbia University Medical Centre Institutional Review Board.  
18  
19  
20

#### 21 **CONTRIBUTORS:**

22 EJA and LM conceptualized the study. TKP, SLR and AZ directed data collection. VI  
23 conducted the analysis, led data interpretation and drafted the manuscript, with critical inputs  
24 from KB, TKP, SLR, JAM, AZ, GP, EJA and LM. All authors read and approved the final  
25 manuscript to be published.  
26  
27  
28  
29  
30

#### 31 **DATA SHARING STATEMENT**

32 No additional data are available.  
33  
34  
35  
36  
37  
38  
39  
40  
41  
42  
43  
44  
45  
46  
47  
48  
49  
50  
51  
52  
53  
54  
55  
56  
57  
58  
59  
60

## REFERENCES

1. UNAIDS. Global AIDS update 2016. Geneva: UNIADS 2016.
2. UNAIDS Data 2017: UNAIDS 2017
3. Shisana O, Rehle T, Simbayi L, et al. South African national HIV prevalence, incidence and behaviour survey, 2012.
4. The National Antenatal Sentinel HIV Prevalence Survey, South Africa, 2013, National Department of Health.
5. Bhardwaj S, Treger-Slavin L, Barron P, et al. Elimination of mother-to-child transmission of HIV in South Africa: rapid scale-up using quality improvement: prevention of mother-to-child transmission-Progress towards the Millennium Development Goals. *South African Medical Journal* 2014;104(3):239-43.
6. Joyce T, Kaestner R, Korenman S. The stability of pregnancy intentions and pregnancy-related maternal behaviors. *Maternal and Child Health Journal* 2000;4(3):171-78.
7. Mohllajee AP, Curtis KM, Morrow B, et al. Pregnancy intention and its relationship to birth and maternal outcomes. *Obstetrics & Gynecology* 2007;109(3):678-86.
8. Gipson JD, Koenig MA, Hindin MJ. The effects of unintended pregnancy on infant, child, and parental health: a review of the literature. *Studies in family planning* 2008;39(1):18-38.
9. Kost K, Landry DJ, Darroch JE. Predicting maternal behaviors during pregnancy: does intention status matter? *Family planning perspectives* 1998:79-88.
10. Wado YD, Afework MF, Hindin MJ. Unintended pregnancies and the use of maternal health services in southwestern Ethiopia. *BMC international health and human rights* 2013;13(1):36.
11. World Health Organization. PMTCT strategic vision 2010-2015: preventing mother-to-child transmission of HIV to reach the UNGASS and Millennium Development Goals: World health Organization 2010.
12. Reynolds H, Janowitz B, Wilcher R, et al. Contraception to prevent HIV-positive births: current contribution and potential cost savings in PEPFAR countries. *Sexually transmitted infections* 2008;84(Suppl 2):ii49-ii53.
13. Reynolds HW, Janowitz B, Homan R, et al. The value of contraception to prevent perinatal HIV transmission. *Sexually transmitted diseases* 2006;33(6):350-56.
14. Credé S, Hoke T, Constant D, et al. Factors impacting knowledge and use of long acting and permanent contraceptive methods by postpartum HIV positive and negative women in Cape Town, South Africa: a cross-sectional study. *BMC Public Health* 2012;12(1):197.

15. Kaida A, Laher F, Strathdee SA, et al. Contraceptive use and method preference among women in Soweto, South Africa: the influence of expanding access to HIV care and treatment services. *PloS one* 2010;5(11):e13868.
16. National Department of Health. South African Demographic and Health Survey. South Africa, 2003
17. Sedgh G, Singh S, Hussain R. Intended and Unintended Pregnancies Worldwide in 2012 and Recent Trends. *Studies in family planning* 2014;45(3):301-14
18. Kikuchi K, Wakasugi N, Poudel KC, et al. High rate of unintended pregnancies after knowing of HIV infection among HIV positive women under antiretroviral treatment in Kigali, Rwanda. *Bioscience trends* 2011;5(6):255-63.
19. Mayondi GK, Wirth K, Morroni C, et al. Unintended pregnancy, contraceptive use, and childbearing desires among HIV-infected and HIV-uninfected women in Botswana: a cross-sectional study. *BMC public health* 2016;16(1):44.
20. McCoy SI, Buzdugan R, Ralph LJ, et al. Unmet need for family planning, contraceptive failure, and unintended pregnancy among HIV-infected and HIV-uninfected women in Zimbabwe. *PLoS One* 2014;9(8):e105320.
21. Warren CE, Abuya T, Askew I. Family planning practices and pregnancy intentions among HIV-positive and HIV-negative postpartum women in Swaziland: a cross sectional survey. *BMC pregnancy and childbirth* 2013;13(1):150.
22. Schwartz SR, Rees H, Mehta S, et al. High incidence of unplanned pregnancy after antiretroviral therapy initiation: findings from a prospective cohort study in South Africa. *PloS one* 2012;7(4):e36039.
23. Loutfy M, Raboud J, Wong J, et al. High prevalence of unintended pregnancies in HIV-positive women of reproductive age in Ontario, Canada: a retrospective study. *HIV medicine* 2012;13(2):107-17.
24. Loutfy M, Raboud J, Wong J, et al. High prevalence of unintended pregnancies in HIV-positive women of reproductive age in Ontario, Canada: a retrospective study. *HIV Med* 2012;13(2):107-17.
25. Sutton MY, Patel R, Frazier EL. Unplanned pregnancies among HIV-infected women in care—United States. *JAIDS Journal of Acquired Immune Deficiency Syndromes* 2014;65(3):350-58.
26. Myer L, Morroni C, Rebe K. Prevalence and determinants of fertility intentions of HIV-infected women and men receiving antiretroviral therapy in South Africa. *AIDS patient care and STDs* 2007;21(4):278-85.
27. Myer L, Phillips TK, Zerbe A, et al. Optimizing antiretroviral therapy (ART) for maternal and child health (MCH): rationale and design of the MCH-ART study. *Journal of Acquired Immune Deficiency Syndromes (1999)* 2016;72(Suppl 2):S189.

- 1  
2  
3  
4 28. Myer L, Stein DJ, Grimsrud A, et al. Social determinants of psychological distress  
5 in a nationally-representative sample of South African adults. *Social science &*  
6 *medicine* (1982) 2008;66(8):1828-40. doi: 10.1016/j.socscimed.2008.01.025  
7
- 8 29. Barrett G, Smith SC, Wellings K. Conceptualisation, development, and evaluation  
9 of a measure of unplanned pregnancy. *Journal of epidemiology and community*  
10 *health* 2004;58(5):426-33.  
11
- 12 30. Julia Raifman TC, Frank Tanser, Tinofa Mutevedzi, Philippa Matthews, Kobus  
13 Herbst, Deenan Pillay, Till Bärnighausen. Preventing Unintended Pregnancy and  
14 HIV Transmission: Effects of the HIV Treatment Cascade on Contraceptive Use and  
15 Choice in Rural KwaZulu-Natal. *Journal of acquired immune deficiency syndromes*  
16 (1999) 2014;67:S218–S27.  
17
- 18 31. Oulman E, Kim TH, Yunis K, Tamim H. Prevalence and predictors of unintended  
19 pregnancy among women: an analysis of the Canadian Maternity Experiences  
20 Survey. *BMC Pregnancy Childbirth*. 2015;15:260.  
21
- 22 32. Warren CE, Abuya T, Askew I. Family planning practices and pregnancy intentions  
23 among HIV-positive and HIV-negative postpartum women in Swaziland: a cross  
24 sectional survey. *BMC pregnancy and childbirth*. 2013;13(1):150.  
25
- 26 33. Cooper D, Harries J, Myer L, Orner P, Bracken H, Zweigenthal V. "Life is still  
27 going on": reproductive intentions among HIV-positive women and men in South  
28 Africa. *Soc Sci Med*. 2007;65(2):274-83.  
29
- 30 34. Wall KM, Haddad L, Vwalika B, et al. Unintended pregnancy among HIV positive  
31 couples receiving integrated HIV counseling, testing, and family planning services  
32 in Zambia. *PloS one* 2013;8(9):e75353.  
33
- 34 35. National Department of Health. South Africa Demographic and Health Survey  
35 2016: Key Indicator Report, Statistics South Africa. 2016.  
36
- 37 36. Chersich MF, Wabiri N, Risher K, Shisana O, Celentano D, Rehle T, et al.  
38 Contraception coverage and methods used among women in South Africa: A  
39 national household survey. *South African medical journal = Suid-Afrikaanse*  
40 *tydskrif vir geneeskunde*. 2017;107(4):307-14.  
41
- 42 37. Hall J, Barrett G, Mbwana N, et al. Understanding pregnancy planning in a low-  
43 income country setting: validation of the London measure of unplanned pregnancy  
44 in Malawi. *BMC pregnancy and childbirth* 2013;13(1):200.  
45  
46  
47  
48  
49  
50  
51  
52  
53  
54  
55  
56  
57  
58  
59  
60

Table 1: *Demographic characteristics of women booking for antenatal care by HIV status and antiretroviral treatment*

| <b>Women's characteristics</b>                          | <b>Total<br/>(N=2105)</b> | <b>Known HIV+<br/>on ART<br/>(N=556)</b> | <b>Known HIV+<br/>Not on ART<br/>(N=444)</b> | <b>Newly<br/>Diagnosed<br/>(N=512)</b> | <b>HIV-Negative<br/>(N=2105)</b> | <b>P-value*</b> |
|---------------------------------------------------------|---------------------------|------------------------------------------|----------------------------------------------|----------------------------------------|----------------------------------|-----------------|
| Age, years                                              | 28 (24-33)                | 31 (28-34)                               | 29 (26-32)                                   | 26 (22-30)                             | 27 (23-32)                       |                 |
| Age Category                                            |                           |                                          |                                              |                                        |                                  |                 |
| 18-24                                                   | 532 (25)                  | 51 (9)                                   | 77 (17)                                      | 187 (37)                               | 217 (37)                         | <0.001          |
| 25-34                                                   | 1235 (59)                 | 368 (66)                                 | 307 (69)                                     | 276 (54)                               | 284 (48)                         |                 |
| 35-44                                                   | 338 (16)                  | 137 (25)                                 | 60 (14)                                      | 49 (9)                                 | 92 (15)                          |                 |
| Parity                                                  | 1 (1-2)                   | 2 (1-2)                                  | 2 (1-2)                                      | 1 (0-2)                                | 1 (0-2)                          | <0.001          |
| Completed High School                                   | 601 (29)                  | 109 (20)                                 | 103 (23)                                     | 359 (70)                               | 236 (40)                         | <0.001          |
| Employment Status                                       |                           |                                          |                                              |                                        |                                  |                 |
| Employed                                                | 833 (39)                  | 210 (38)                                 | 144 (32)                                     | 200 (39)                               | 275 (46)                         | <0.001          |
| Housing                                                 |                           |                                          |                                              |                                        |                                  |                 |
| Informal                                                | 1100 (52)                 | 318 (57)                                 | 236 (53)                                     | 270 (53)                               | 276 (47)                         | 0.005           |
| Socioeconomic Status (SES)                              |                           |                                          |                                              |                                        |                                  |                 |
| Low                                                     | 524 (25)                  | 166 (30)                                 | 132 (30)                                     | 139 (27)                               | 87 (15)                          |                 |
| Low-Moderate                                            | 469 (22)                  | 134 (24)                                 | 103 (23)                                     | 108 (21)                               | 124 (21)                         |                 |
| Moderate-High                                           | 565 (27)                  | 164 (30)                                 | 116 (26)                                     | 127 (25)                               | 158 (27)                         |                 |
| High                                                    | 541 (26)                  | 92 (16)                                  | 93 (21)                                      | 138 (27)                               | 218 (37)                         |                 |
| Married/Cohabiting                                      | 882 (43)                  | 258 (47)                                 | 200 (47)                                     | 180 (36)                               | 244 (42)                         | <0.001          |
| Disclosed HIV Status to Current Partner                 | 816 (55)                  | 462 (84)                                 | 289 (67)                                     | 65 (13)                                | NA                               | <0.001          |
| Single item question - Current Pregnancy Intention      |                           |                                          |                                              |                                        |                                  |                 |
| Unintended                                              | 1347 (64)                 | 310 (56)                                 | 291 (66)                                     | 343 (67)                               | 403 (68)                         | <0.001          |
| Intended                                                | 752 (36)                  | 244 (44)                                 | 152 (34)                                     | 167 (33)                               | 189 (32)                         |                 |
| Unsure                                                  | 5 (0)                     | 2 (0)                                    | 1 (0)                                        | 2 (0)                                  | 0 (0)                            |                 |
| Used Contraceptives in Past 12 Months                   | 1459 (69)                 | 414 (74)                                 | 287 (65)                                     | 320 (63)                               | 438 (74)                         | <0.001          |
| Contraceptive Method Used in Past 12 Months             |                           |                                          |                                              |                                        |                                  |                 |
| None                                                    | 646 (31)                  | 142 (26)                                 | 157 (36)                                     | 192 (38)                               | 155 (26)                         | <0.001          |
| Oral Contraceptive                                      | 57 (3)                    | 5 (1)                                    | 8 (2)                                        | 12 (3)                                 | 32 (5)                           |                 |
| Injectable                                              | 752 (36)                  | 152 (27)                                 | 139 (31)                                     | 155 (30)                               | 306 (52)                         |                 |
| IUD                                                     | 8 (0)                     | 0                                        | 2                                            | 2 (0)                                  | 4 (1)                            |                 |
| Sterilization                                           | 1 (0)                     | 0                                        | 0                                            | 0                                      | 1 (0)                            |                 |
| Condom                                                  | 641 (30)                  | 257 (46)                                 | 138 (31)                                     | 151 (29)                               | 95 (16)                          |                 |
| Discussed Family Planning with Partner in Past 12months | 964 (49)                  | 275 (54)                                 | 198 (49)                                     | 235 (50)                               | 256 (44)                         | 0.006           |

Note: Values are given as number (percentage) or median (interquartile range)

Abbreviations: HIV+, HIV positive; HIV-, HIV negative; ART, Antiretroviral therapy; IQR, inter-quartile range

\*Chi-square or Fisher's exact tests were used to assess bivariate associations

Table 2: *The London Measure of Unplanned Pregnancy intention scores in comparison with the single item on pregnancy intentions*

| <b>Single item - Pregnancy Intention</b> | <b>London Measure of Unplanned Pregnancy</b> |                              |                               |                            |
|------------------------------------------|----------------------------------------------|------------------------------|-------------------------------|----------------------------|
|                                          | <b>Total<br/>(N=2105)</b>                    | <b>Unplanned<br/>(N=959)</b> | <b>Ambivalent<br/>(N=607)</b> | <b>Planned<br/>(N=539)</b> |
| <b>No</b>                                | 1347 (64)                                    | <b>950 (99)</b>              | 346 (57)                      | 51 (9)                     |
| <b>Yes</b>                               | 752 (36)                                     | 8 (1)                        | 256 (42)                      | <b>488 (91)</b>            |
| <b>Unsure</b>                            | 5 (0)                                        | 0 (0)                        | <b>5 (1)</b>                  | 0 (0)                      |

Note: Values are given as number (percentage)

Table 3: Demographic characteristics of participants by the London Measure of Unplanned Pregnancy intention categories

| Women's Characteristics                                 | Total<br>(N=2105) | Unplanned<br>(N=959) | Ambivalent<br>(N=607) | Planned<br>(N=539) | P-value* |
|---------------------------------------------------------|-------------------|----------------------|-----------------------|--------------------|----------|
| Age, years                                              | 28 (24-33)        | 28 (24-32)           | 28 (25-33)            | 29 (25-33)         | <0.001   |
| Age Category                                            |                   |                      |                       |                    |          |
| 18-24                                                   | 532 (25)          | 274 (29)             | 150 (25)              | 108 (20)           |          |
| 25-34                                                   | 1235 (59)         | 548 (57)             | 356 (59)              | 331 (61)           | 0.004    |
| 35-44                                                   | 338 (16)          | 137 (14)             | 101 (17)              | 100 (19)           |          |
| Parity, Median                                          | 1 (1-2)           | 1 (1-2)              | 1 (1-2)               | 1 (1-2)            | <0.001   |
| Completed High School                                   |                   |                      |                       |                    |          |
| Yes                                                     | 601 (29)          | 236 (25)             | 205 (34)              | 160 (30)           | <0.001   |
| Level of Education                                      |                   |                      |                       |                    |          |
| Primary                                                 | 73 (3)            | 38 (4)               | 16 (3)                | 19 (3)             |          |
| Secondary                                               | 1973 (94)         | 889 (93)             | 574 (94)              | 510 (95)           | 0.309    |
| Tertiary                                                | 59 (3)            | 32 (3)               | 17 (3)                | 10 (2)             |          |
| Employment Status                                       |                   |                      |                       |                    |          |
| Employed                                                | 833 (39)          | 352 (37)             | 265 (44)              | 212 (39)           | 0.022    |
| Housing                                                 |                   |                      |                       |                    |          |
| Informal                                                | 1100 (52)         | 476 (50)             | 307 (51)              | 317 (59)           | 0.002    |
| Socio-economic Status                                   |                   |                      |                       |                    |          |
| Low                                                     | 524 (25)          | 274 (29)             | 118 (19)              | 132 (25)           |          |
| Low-Moderate                                            | 469 (22)          | 195 (20)             | 143 (24)              | 131 (24)           | 0.004    |
| Moderate-High                                           | 565 (27)          | 251 (26)             | 167 (28)              | 147 (27)           |          |
| High                                                    | 541 (26)          | 238 (25)             | 175 (29)              | 128 (24)           |          |
| Married/Cohabiting                                      |                   |                      |                       |                    |          |
| Yes                                                     | 882 (43)          | 273 (30)             | 242 (40)              | 367 (69)           | <0.001   |
| Disclosed HIV Status to Current Partner (HIV+ Women)    | 816 (55)          | 367 (50)             | 214 (56)              | 235 (64)           | <0.001   |
| Intention of Current Pregnancy                          |                   |                      |                       |                    |          |
| Unintended                                              | 1347 (64)         | 950 (99)             | 346 (57)              | 51 (9)             |          |
| Intended                                                | 752 (36)          | 8 (1)                | 256 (42)              | 488 (91)           | <0.001   |
| Unsure                                                  | 5 (0)             | 0 (0)                | 5 (1)                 | 0 (0)              |          |
| Used Contraceptive in Past 12 Months                    | 1459 (69)         | 721 (75)             | 427 (70)              | 311 (58)           | <0.001   |
| Contraceptive Method Used in Past 12 Months             |                   |                      |                       |                    |          |
| None                                                    | 646 (31)          | 238 (25)             | 180 (30)              | 228 (42)           |          |
| Oral Contraceptive                                      | 57 (3)            | 26 (3)               | 16 (3)                | 15 (3)             |          |
| Injectable                                              | 752 (36)          | 335 (35)             | 233 (38)              | 184 (34)           | <0.001   |
| IUD                                                     | 8 (0)             | 4 (0)                | 2 (0)                 | 2 (0)              |          |
| Sterilization                                           | 1 (0)             | 0 (0)                | 1 (0)                 | 0 (0)              |          |
| Condom                                                  | 641 (30)          | 356 (37)             | 175 (29)              | 110 (20)           |          |
| Discussed Family Planning with Partner in Past 12months | 964 (49)          | 234 (26)             | 347 (60)              | 383 (78)           | <0.001   |

Note: Values are given as number (percentage) or median (interquartile range)

\*Chi-square or Fisher's exact tests were used to assess bivariate associations



Table 4: *Multivariable log-binomial regression model predicting unplanned pregnancy among HIV-positive and HIV-negative women*

| Variables                                   | Univariate analysis |            |         | Multivariate analysis |           |         |
|---------------------------------------------|---------------------|------------|---------|-----------------------|-----------|---------|
|                                             | OR                  | 95% CI     | p-value | AOR                   | 95% CI    | p-value |
| <b>HIV Status and ART Use</b>               |                     |            |         |                       |           |         |
| HIV Negative                                |                     |            |         |                       |           |         |
| Newly Diagnosed                             | 1.35                | 1.03-1.78  | 0.028   | 1.43                  | 1.05-1.94 | 0.020   |
| Known HIV+ - No ART                         | 1.43                | 1.08-1.92  | 0.013   | 1.57                  | 1.13-2.15 | 0.006   |
| Known HIV+ - On ART                         | 1.03                | 0.80-1.34  | 0.766   | 1.10                  | 0.82-1.47 | 0.513   |
| <b>Age Category</b>                         |                     |            |         |                       |           |         |
| 35-44                                       |                     |            |         |                       |           |         |
| 25-34                                       | 1.14                | 0.88- 1.49 | 0.309   | 1.29                  | 0.95-1.75 | 0.099   |
| 18-24                                       | 1.64                | 1.20-2.26  | 0.002   | 1.83                  | 1.23-2.74 | 0.003   |
| <b>Parity</b>                               |                     |            |         |                       |           |         |
| Married/Cohabiting                          |                     |            |         |                       |           |         |
| No                                          |                     |            |         |                       |           |         |
| Yes                                         | 0.23                | 0.19- 0.29 | 0.000   | 0.19                  | 0.15-0.24 | 0.000   |
| <b>Used Contraceptive in Past 12 Months</b> |                     |            |         |                       |           |         |
| No                                          |                     |            |         |                       |           |         |
| Yes                                         | 0.73                | 0.59-0.91  | 0.005   | 1.94                  | 1.55-2.43 | 0.000   |
| <b>Socioeconomic Status</b>                 |                     |            |         |                       |           |         |
| Low                                         |                     |            |         |                       |           |         |
| Low-Middle                                  | 0.86                | 0.65-1.15  | 0.329   | 0.79                  | 0.58-1.08 | 0.151   |
| Middle-High                                 | 0.95                | 0.73-1.26  | 0.755   | 0.74                  | 0.54-1.00 | 0.054   |
| High                                        | 1.08                | 0.82-1.44  | 0.561   | 0.84                  | 0.61-1.16 | 0.301   |
| <b>Finished High School</b>                 |                     |            |         |                       |           |         |
| No                                          |                     |            |         |                       |           |         |
| Yes                                         | 0.92                | 0.74-1.15  | 0.499   | -                     | -         | -       |
| <b>Employed</b>                             |                     |            |         |                       |           |         |
| No                                          |                     |            |         |                       |           |         |
| Yes                                         | 1.00                | 0.81-1.22  | 0.994   | -                     | -         | -       |
| <b>Housing</b>                              |                     |            |         |                       |           |         |
| Informal                                    |                     |            |         |                       |           |         |
| Formal                                      | 1.42                | 1.17-1.73  | 0.000   | -                     | -         | -       |
| <b>Gravidity</b>                            |                     |            |         |                       |           |         |
|                                             | 1.06                | 0.97-1.16  | 0.201   | -                     | -         | -       |

**Abbreviations:** OR, Odds ratio; AOR, Adjusted Odds ratio; CI, Confidence interval

## FIGURE LEGENDS

Figure 1: The distribution of the London Measure of Unplanned Pregnancy scores in HIV positive and negative pregnant women booking for antenatal care, 2013-2015.

Figure 2: The London Measure of Unplanned Pregnancy score categories stratified by HIV status and antiretroviral therapy use.

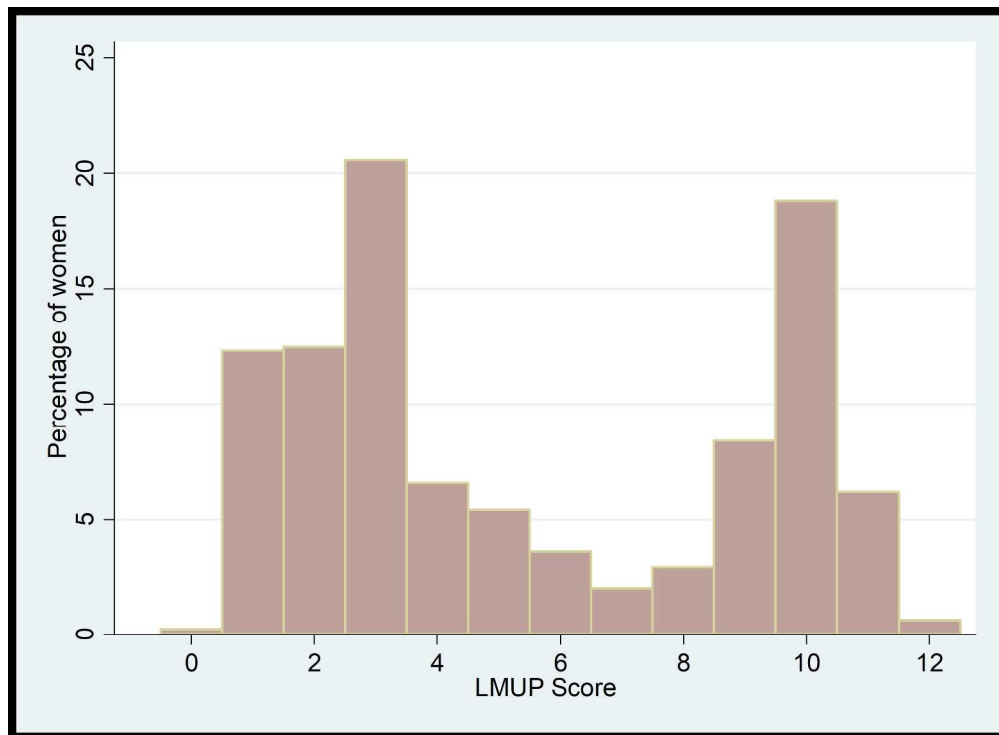

The distribution of the London Measure of Unplanned Pregnancy scores in HIV positive and negative pregnant women booking for antenatal care, 2013-2015.

284x208mm (300 x 300 DPI)

View only

1  
2  
3  
4  
5  
6  
7  
8  
9  
10  
11  
12  
13  
14  
15  
16  
17  
18  
19  
20  
21  
22  
23  
24  
25  
26  
27  
28  
29  
30  
31  
32  
33  
34  
35  
36  
37  
38  
39  
40  
41  
42  
43  
44  
45  
46  
47  
48  
49  
50  
51  
52  
53  
54  
55  
56  
57  
58  
59  
60

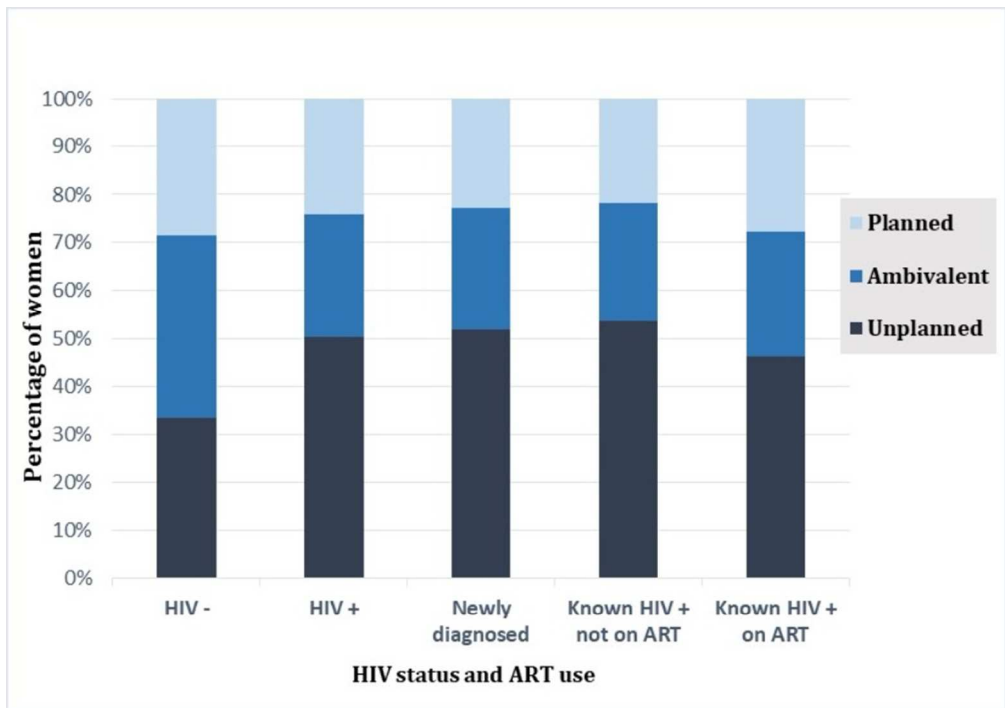

The London Measure of Unplanned Pregnancy score categories stratified by HIV status and antiretroviral therapy use.

84x59mm (300 x 300 DPI)

Peer Review Only

STROBE Statement—Checklist of items that should be included in reports of *cross-sectional studies*

|                              | Item No | Recommendation                                                                                                                                                                                                                                                                                                                                                                                             |
|------------------------------|---------|------------------------------------------------------------------------------------------------------------------------------------------------------------------------------------------------------------------------------------------------------------------------------------------------------------------------------------------------------------------------------------------------------------|
| <b>Title and abstract</b>    | 1       | (a) Indicate the study's design with a commonly used term in the title or the abstract ( <b>p. 1</b> )<br>(b) Provide in the abstract an informative and balanced summary of what was done and what was found ( <b>pp. 2–3</b> )                                                                                                                                                                           |
| <b>Introduction</b>          |         |                                                                                                                                                                                                                                                                                                                                                                                                            |
| Background/rationale         | 2       | Explain the scientific background and rationale for the investigation being reported ( <b>p. 1, paragraph 2 + p. 5, paragraph 1</b> )                                                                                                                                                                                                                                                                      |
| Objectives                   | 3       | State specific objectives, including any prespecified hypotheses ( <b>p. 5, paragraph 3</b> )                                                                                                                                                                                                                                                                                                              |
| <b>Methods</b>               |         |                                                                                                                                                                                                                                                                                                                                                                                                            |
| Study design                 | 4       | Present key elements of study design early in the paper ( <b>pp. 6-7</b> )                                                                                                                                                                                                                                                                                                                                 |
| Setting                      | 5       | Describe the setting, locations, and relevant dates, including periods of recruitment, exposure, follow-up, and data collection ( <b>pp. 6-7</b> )                                                                                                                                                                                                                                                         |
| Participants                 | 6       | (a) Give the eligibility criteria, and the sources and methods of selection of participants ( <b>p. 6, paragraph 1</b> )                                                                                                                                                                                                                                                                                   |
| Variables                    | 7       | Clearly define all outcomes, exposures, predictors, potential confounders, and effect modifiers. Give diagnostic criteria, if applicable ( <b>pp. 6-7</b> )                                                                                                                                                                                                                                                |
| Data sources/<br>measurement | 8*      | For each variable of interest, give sources of data and details of methods of assessment (measurement). Describe comparability of assessment methods if there is more than one group ( <b>pp. 6-7</b> )                                                                                                                                                                                                    |
| Bias                         | 9       | Describe any efforts to address potential sources of bias ( <b>pp. 6 paragraph 3</b> )                                                                                                                                                                                                                                                                                                                     |
| Study size                   | 10      | Explain how the study size was arrived at ( <b>p. 6</b> )                                                                                                                                                                                                                                                                                                                                                  |
| Quantitative variables       | 11      | Explain how quantitative variables were handled in the analyses. If applicable, describe which groupings were chosen and why ( <b>p. 7</b> )                                                                                                                                                                                                                                                               |
| Statistical methods          | 12      | (a) Describe all statistical methods, including those used to control for confounding ( <b>p. 7</b> )<br>(b) Describe any methods used to examine subgroups and interactions ( <b>p. 7</b> )<br>(c) Explain how missing data were addressed ( <b>p. 7</b> )<br>(d) If applicable, describe analytical methods taking account of sampling strategy<br>(e) Describe any sensitivity analyses ( <b>p. 7</b> ) |
| <b>Results</b>               |         |                                                                                                                                                                                                                                                                                                                                                                                                            |
| Participants                 | 13*     | (a) Report numbers of individuals at each stage of study—eg numbers potentially eligible, examined for eligibility, confirmed eligible, included in the study, completing follow-up, and analysed ( <b>p. 8</b> )<br>(b) Give reasons for non-participation at each stage ( <b>N/A</b> )<br>(c) Consider use of a flow diagram ( <b>N/A</b> )                                                              |
| Descriptive data             | 14*     | (a) Give characteristics of study participants (eg demographic, clinical, social) and information on exposures and potential <b>confounders</b> ( <b>Table 1</b> )<br>(b) Indicate number of participants with missing data for each variable of interest ( <b>N/A</b> )                                                                                                                                   |
| Outcome data                 | 15*     | Report numbers of outcome events or summary measures ( <b>p. 7</b> )                                                                                                                                                                                                                                                                                                                                       |
| Main results                 | 16      | (a) Give unadjusted estimates and, if applicable, confounder-adjusted estimates and their precision (eg, 95% confidence interval). Make clear which confounders were adjusted for and why they were included ( <b>p. 9 + Table 4</b> )<br>(b) Report category boundaries when continuous variables were categorized ( <b>N/A</b> )                                                                         |

(c) If relevant, consider translating estimates of relative risk into absolute risk for a meaningful time period

|                          |    |                                                                                                                                                                                                            |
|--------------------------|----|------------------------------------------------------------------------------------------------------------------------------------------------------------------------------------------------------------|
| Other analyses           | 17 | Report other analyses done—eg analyses of subgroups and interactions, and sensitivity analyses ( <i>p. 21 +Table 2</i> )                                                                                   |
| <b>Discussion</b>        |    |                                                                                                                                                                                                            |
| Key results              | 18 | Summarise key results with reference to study objectives applicable ( <b>pp. 10-11</b> )                                                                                                                   |
| Limitations              | 19 | Discuss limitations of the study, taking into account sources of potential bias or imprecision. Discuss both direction and magnitude of any potential bias applicable ( <b>pp. 12-13</b> )                 |
| Interpretation           | 20 | Give a cautious overall interpretation of results considering objectives, limitations, multiplicity of analyses, results from similar studies, and other relevant evidence applicable ( <b>pp. 10-13</b> ) |
| Generalisability         | 21 | Discuss the generalisability (external validity) of the study results applicable ( <b>p. 11</b> )                                                                                                          |
| <b>Other information</b> |    |                                                                                                                                                                                                            |
| Funding                  | 22 | Give the source of funding and the role of the funders for the present study and, if applicable, for the original study on which the present article is based ( <b>p. 13</b> )                             |

\*Give information separately for exposed and unexposed groups.

**Note:** An Explanation and Elaboration article discusses each checklist item and gives methodological background and published examples of transparent reporting. The STROBE checklist is best used in conjunction with this article (freely available on the Web sites of PLoS Medicine at <http://www.plosmedicine.org/>, Annals of Internal Medicine at <http://www.annals.org/>, and Epidemiology at <http://www.epidem.com/>). Information on the STROBE Initiative is available at [www.strobe-statement.org](http://www.strobe-statement.org).

# BMJ Open

## Prevalence and determinants of unplanned pregnancy in HIV-positive and HIV-negative pregnant women in Cape Town, South Africa: a cross-sectional study

|                                 |                                                                                                                                                                                                                                                                                                                                                                                                                                                                                                                                                                                                                                                                                                                                                                                                                                                                                                                                                                                                                                                                                                                                                                                                                                                                                                                                                                                                                                                                                                                                                                                                                                                                                                                                                                                                                                 |
|---------------------------------|---------------------------------------------------------------------------------------------------------------------------------------------------------------------------------------------------------------------------------------------------------------------------------------------------------------------------------------------------------------------------------------------------------------------------------------------------------------------------------------------------------------------------------------------------------------------------------------------------------------------------------------------------------------------------------------------------------------------------------------------------------------------------------------------------------------------------------------------------------------------------------------------------------------------------------------------------------------------------------------------------------------------------------------------------------------------------------------------------------------------------------------------------------------------------------------------------------------------------------------------------------------------------------------------------------------------------------------------------------------------------------------------------------------------------------------------------------------------------------------------------------------------------------------------------------------------------------------------------------------------------------------------------------------------------------------------------------------------------------------------------------------------------------------------------------------------------------|
| Journal:                        | <i>BMJ Open</i>                                                                                                                                                                                                                                                                                                                                                                                                                                                                                                                                                                                                                                                                                                                                                                                                                                                                                                                                                                                                                                                                                                                                                                                                                                                                                                                                                                                                                                                                                                                                                                                                                                                                                                                                                                                                                 |
| Manuscript ID                   | bmjopen-2017-019979.R2                                                                                                                                                                                                                                                                                                                                                                                                                                                                                                                                                                                                                                                                                                                                                                                                                                                                                                                                                                                                                                                                                                                                                                                                                                                                                                                                                                                                                                                                                                                                                                                                                                                                                                                                                                                                          |
| Article Type:                   | Research                                                                                                                                                                                                                                                                                                                                                                                                                                                                                                                                                                                                                                                                                                                                                                                                                                                                                                                                                                                                                                                                                                                                                                                                                                                                                                                                                                                                                                                                                                                                                                                                                                                                                                                                                                                                                        |
| Date Submitted by the Author:   | 15-Feb-2018                                                                                                                                                                                                                                                                                                                                                                                                                                                                                                                                                                                                                                                                                                                                                                                                                                                                                                                                                                                                                                                                                                                                                                                                                                                                                                                                                                                                                                                                                                                                                                                                                                                                                                                                                                                                                     |
| Complete List of Authors:       | <p>Iyun, Victoria; University of Cape Town, Division of Epidemiology &amp; Biostatistics, School of Public health and Family Medicine; University of Cape Town, Centre for Infectious Disease Epidemiology &amp; Research, School of Public Health &amp; Family Medicine</p> <p>Brittain, Kirsty ; University of Cape Town, Division of Epidemiology &amp; Biostatistics, School of Public Health &amp; Family Medicine; University of Cape Town, Centre for Infectious Disease Epidemiology &amp; Research, School of Public Health and Family Medicine</p> <p>Phillips, Tamsin; University of Cape Town, Division of Epidemiology &amp; Biostatistics, School of Public Health &amp; Family Medicine; University of Cape Town, Centre for Infectious Disease Epidemiology &amp; Research, School of Public health and Family Medicine</p> <p>le Roux, Stanzi; University of Cape Town, Division of Epidemiology &amp; Biostatistics, School of Public health and Family Medicine</p> <p>McIntyre, James; University of Cape Town, Division of Epidemiology &amp; Biostatistics, School of Public health and Family Medicine; Anova Health Institute</p> <p>Zerbe, A; Columbia University, ICAP at Columbia, Mailman School of Public Health</p> <p>Petro, Greg; University of Cape Town, Department of Obstetrics &amp; Gynaecology; New Somerset Hospital</p> <p>Abrams, Elaine; Columbia University, ICAP at Columbia, Mailman School of Public Health; Columbia University, College of Physicians &amp; Surgeons</p> <p>Myer, Landon; University of Cape Town, Division of Epidemiology &amp; Biostatistics, School of Public Health &amp; Family Medicine, University of Cape Town; University of Cape Town, Centre for Infectious Disease Epidemiology &amp; Research, School of Public Health &amp; Family Medicine</p> |
| <b>Primary Subject Heading</b>: | Public health                                                                                                                                                                                                                                                                                                                                                                                                                                                                                                                                                                                                                                                                                                                                                                                                                                                                                                                                                                                                                                                                                                                                                                                                                                                                                                                                                                                                                                                                                                                                                                                                                                                                                                                                                                                                                   |
| Secondary Subject Heading:      | Infectious diseases, Epidemiology, HIV/AIDS, Sexual health                                                                                                                                                                                                                                                                                                                                                                                                                                                                                                                                                                                                                                                                                                                                                                                                                                                                                                                                                                                                                                                                                                                                                                                                                                                                                                                                                                                                                                                                                                                                                                                                                                                                                                                                                                      |
| Keywords:                       | unplanned pregnancy, contraception, family planning, HIV, women                                                                                                                                                                                                                                                                                                                                                                                                                                                                                                                                                                                                                                                                                                                                                                                                                                                                                                                                                                                                                                                                                                                                                                                                                                                                                                                                                                                                                                                                                                                                                                                                                                                                                                                                                                 |
|                                 |                                                                                                                                                                                                                                                                                                                                                                                                                                                                                                                                                                                                                                                                                                                                                                                                                                                                                                                                                                                                                                                                                                                                                                                                                                                                                                                                                                                                                                                                                                                                                                                                                                                                                                                                                                                                                                 |

1  
2  
3  
4  
5  
6  
7  
8  
9  
10  
11  
12  
13  
14  
15  
16  
17  
18  
19  
20  
21  
22  
23  
24  
25  
26  
27  
28  
29  
30  
31  
32  
33  
34  
35  
36  
37  
38  
39  
40  
41  
42  
43  
44  
45  
46  
47  
48  
49  
50  
51  
52  
53  
54  
55  
56  
57  
58  
59  
60

SCHOLARONE™  
Manuscripts

For peer review only

1  
2  
3 Title

4 **Prevalence and determinants of unplanned pregnancy in HIV-positive and HIV-**  
5 **negative pregnant women in Cape Town, South Africa: a cross-sectional study**  
6  
7

8 Short title

9 *Unplanned pregnancy among HIV-positive and HIV-negative pregnant women in South*  
10 *Africa*  
11  
12

13 Authors

14 Victoria Iyun<sup>1,2</sup>, Kirsty Brittain<sup>1,2</sup>, Tamsin K. Phillips<sup>1,2</sup>, Stanzi le Roux<sup>1</sup>, James A.  
15 McIntyre<sup>1,3</sup>, Allison Zerbe<sup>4</sup>, Greg Petro<sup>5</sup>, Elaine J. Abrams<sup>4,6</sup>, Landon Myer<sup>1,2\*</sup>  
16  
17

- 18 1. Division of Epidemiology & Biostatistics, School of Public Health & Family Medicine,  
19 University of Cape Town, Cape Town, South Africa
- 20 2. Centre for Infectious Disease Epidemiology & Research, School of Public Health &  
21 Family Medicine, University of Cape Town, Cape Town, South Africa
- 22 3. Anova Health Institute, Johannesburg, South Africa
- 23 4. ICAP at Columbia, Mailman School of Public Health, Columbia University, New York,  
24 USA
- 25 5. Department of Obstetrics & Gynaecology, University of Cape Town & New Somerset  
26 Hospital, Cape Town, South Africa
- 27 6. College of Physicians & Surgeons, Columbia University, New York, USA  
28  
29

30 \*Corresponding author:  
31

32 Address Division of Epidemiology and Biostatistics  
33 School of Public Health & Family Medicine  
34 University of Cape Town Faculty of Health Sciences  
35 Anzio Road, Observatory  
36 Cape Town 7925, South Africa  
37 Email: [landon.myer@uct.ac.za](mailto:landon.myer@uct.ac.za)  
38 Tel: +27 21 406 6661  
39  
40  
41  
42  
43  
44  
45  
46  
47  
48  
49  
50  
51  
52  
53  
54  
55  
56  
57  
58  
59  
60



## ABSTRACT

**Objectives:** Prevention of unplanned pregnancy is a crucial aspect of preventing mother-to-child HIV transmission (PMTCT). There are few data investigating how HIV status and use of antiretroviral therapy (ART) influences pregnancy planning in high HIV burden settings. Our objective was to examine the prevalence and determinants of unplanned pregnancy among HIV-positive and HIV-negative women in Cape Town, South Africa.

**Design:** Cross-sectional analysis.

**Settings:** Single primary-level antenatal care clinic in Cape Town, South Africa.

**Participants:** HIV-positive and -negative pregnant women, booking for antenatal care from March 2013 - August 2015, were included.

**Main Outcome measures:** Unplanned pregnancy was measured at the first antenatal care visit using the London Measure of Unplanned Pregnancy (LMUP). Analyses examined LMUP scores across four groups of participants defined by their HIV status, awareness of their HIV status prior to the current pregnancy, and/or whether they were using ART prior to the current pregnancy.

**Results:** Among 2105 pregnant women (1512 HIV-positive; 593 HIV-negative), median age was 28 years, 43% were married/co-habiting and 20% were nulliparous. Levels of unplanned pregnancy were significantly higher in HIV-positive versus HIV-negative women (50% vs. 33%,  $p < 0.001$ ); and highest in women who were known HIV-positive but not on ART (53%). After adjusting for age, parity and marital status, unplanned pregnancy was most common among women newly diagnosed and women who were known HIV-positive but not on ART (compared to HIV-negative women, adjusted odds ratio [aOR]: 1.43; 95% confidence interval [CI]: 1.05-1.94 and aOR: 1.57; 95% CI: 1.13-2.15, respectively). Increased parity and younger age (<24 years) were also associated with unplanned pregnancy (aOR: 1.42; 95% CI: 1.25-1.60 and aOR: 1.83; 95% CI: 1.23-2.74, respectively).

**Conclusions:** We observed high levels of unplanned pregnancy, particularly among HIV-positive women not on ART, suggesting ongoing missed opportunities for improved family planning and counselling services for HIV-positive women.

### Strengths and limitations of this study:

- This is one of the first studies to examine pregnancy intentions in a large sample of HIV-positive and negative women aged (18-44) in South Africa.
- This study utilized a robust pregnancy intention instrument fairly new to our study setting; the London Measure of Unplanned Pregnancy, to measure levels of unplanned pregnancy.
- The cross-sectional design means that causal associations of unplanned pregnancy could not be determined.
- This study included participants based on convenience sampling from a single urban setting, therefore findings may not be generalizable to other resource-limited settings.
- Our retrospective self-reported measurement of pregnancy intentions after pregnancy recognition and entering antenatal care, may have increased acceptance of the pregnancy and resulted in over reporting of planned pregnancy.

## INTRODUCTION

Efforts to eliminate mother-to-child transmission of HIV (MTCT) continue to escalate globally and advances in prevention of mother-to-child transmission (PMTCT) services have led to significant reductions in the number of new paediatric infections across resource-limited settings including Africa.<sup>1</sup> In South Africa, over 95% of HIV-infected pregnant women receive triple drug antiretroviral therapy (ART) during pregnancy and breastfeeding and the rate of MTCT declined from 8% in 2008 to 1.3 % in 2016.<sup>1 2</sup>

South Africa has the highest number of individuals living with HIV worldwide with up to 18.8% prevalence among women of child-bearing age.<sup>3</sup> HIV prevalence is particularly high among pregnant women, with almost 30% of those seeking antenatal care (ANC) testing HIV-positive nationally.<sup>4</sup> Despite the substantial efforts of national PMTCT programmes in high-burden countries, new paediatric infections remains a major public health concern.<sup>2 5</sup>

Even where ART is widely available to pregnant and breastfeeding women, the timing and planning of a pregnancy may be important determinants of MTCT.<sup>6 7</sup> Unplanned pregnancies predict maternal health behaviours during pregnancy and in the postpartum period, including late presentation for ANC, reduced ART adherence and suboptimal breastfeeding practices.<sup>7-10</sup> Preventing unplanned pregnancies among HIV-positive women through addressing the unmet need for family planning is a relatively low-cost, effective method for preventing new paediatric HIV infections.<sup>11 12 13</sup> Contraceptive use is high in South Africa with an estimated 65% of sexually active women using at least one method and studies have shown an association between contraception and pregnancy intentions.<sup>14 15</sup> Modern contraceptive methods are freely available at public sector health care facilities in South Africa with short acting methods—primarily injectable contraceptives being the most commonly used by sexually active women in South Africa.<sup>16</sup>

An estimated 40% of all pregnancies worldwide and 35% of pregnancies in Africa are unplanned.<sup>17</sup> In comparison, 35-65% of pregnancies among HIV-positive women across sub-Saharan Africa may be unplanned,<sup>18-21</sup> with up to two-thirds of HIV-positive women reporting unplanned pregnancies in South Africa.<sup>14 22</sup> However, the current evidence for the association between HIV status, ART use and unplanned pregnancy remains inconsistent.<sup>23</sup> While some previous studies documented higher levels of unplanned pregnancies among

1  
2 HIV-positive compared to HIV-negative women,<sup>20</sup> others found no association between HIV  
3 status and unplanned pregnancy.<sup>24 25</sup>  
4  
5

6  
7 Women who are not aware of their HIV status prior to conception may be more likely to have  
8 an unplanned pregnancy. Findings from a recent study in Botswana demonstrated an almost  
9 2-fold increase in the likelihood of unplanned pregnancy among women unaware of their  
10 HIV-positive serostatus prior to conception compared to those who were aware.<sup>19</sup> In contrast,  
11 there is also some evidence to suggest that pregnancy incidence is significantly higher for  
12 women after ART initiation compared to those not on ART, and approximately 60% of HIV-  
13 positive women on ART experience an unplanned pregnancy.<sup>18 22 26</sup> There are few robust  
14 data on pregnancy planning among HIV-positive women initiating ART in the current era of  
15 PMTCT. In this context, there is a clear need for further insights into pregnancy planning and  
16 associated factors among HIV-positive women in high burden settings. To address this, we  
17 examined the prevalence and determinants of unplanned pregnancy among HIV-positive and  
18 HIV-negative women in Cape Town, South Africa.  
19  
20  
21  
22  
23  
24  
25

## 26 27 **METHODS**

### 28 29 30 **Study setting and design**

31  
32 This cross-sectional analysis utilized data obtained from the enrolment visit of the MCH-  
33 ART (Maternal-Child Health Antiretroviral Therapy) study, a multicomponent  
34 implementation science study investigating optimal strategies for delivering ART services to  
35 HIV-positive pregnant and postpartum women (ClinicalTrials.gov NCT01933477). The study  
36 took place in the community of Gugulethu, a historically disadvantaged community with a  
37 high burden of HIV. The MCH-ART study methods have been described in detail  
38 previously.<sup>27</sup> Briefly, 1554 HIV-positive pregnant women above 18 years of age were  
39 consecutively enrolled at their first ANC visit. In addition, this analysis utilized data from a  
40 parallel sub-study to MCH-ART, the HIV-unexposed, uninfected (HU2) study which enrolled  
41 612 HIV-negative women attending their first ANC visit, to provide a comparison group.<sup>27</sup>  
42 For this analysis we restricted the sample to 1512 HIV-positive women and 593 HIV-  
43 negative women who had complete data on pregnancy planning.  
44  
45  
46  
47  
48  
49  
50  
51  
52

### 53 **Ethical considerations**

54 The MCH-ART and HU2 studies were approved by the University of Cape Town's Faculty  
55 of Health Sciences Human Research Ethics Committee and the Institutional Review Board of  
56  
57  
58  
59

1  
2 Columbia University. All participants provided a written informed consent prior to  
3 participation in both studies.  
4  
5

### 6 7 **Data collection**

8  
9  
10 Following enrolment at their first ANC visit, all participants completed a structured  
11 interviewer-administered questionnaire in their language of choice - isiXhosa or English.  
12 Information collected included basic socio-demographic characteristics, medical history,  
13 pregnancy intentions and contraceptive use. All measures were translated into isiXhosa, and  
14 back-translated into English by a second translator, to ensure accuracy.  
15  
16  
17

18  
19  
20 Contraceptive use was defined as any contraceptive method used in the 12 months prior to  
21 pregnancy recognition. A categorical variable was created for socio-economic status (SES)  
22 based on employment status, years of education, housing type and number of amenities in the  
23 household, and was categorized into quartiles.<sup>28</sup> Pregnancy intentions were assessed using a  
24 validated 6-item questionnaire, the London Measure of Unplanned Pregnancy (LMUP). This  
25 instrument asked women to report the circumstances of their most recent pregnancy, with  
26 each item in the tool scored 0, 1 or 2 according to published scoring guidelines (LMUP  
27 analysis guidance paper).<sup>29</sup> Women's scores were summed across all 6 items, resulting in a  
28 total score from 0-12 with each point increase representing an increase in pregnancy  
29 intention. Total LMUP scores were divided into categories of pregnancy intentions:  
30 unplanned (0-3), ambivalent (4-9) and planned (10-12), based on the scoring used in the  
31 original development of the scale.<sup>29</sup> A separate single item, three level response question  
32 (Current pregnancy intended: Yes, No, Unsure) was used to examine the performance of the  
33 LMUP.  
34  
35  
36  
37  
38  
39  
40  
41  
42  
43

### 44 **Statistical analysis**

45  
46  
47 Statistical analyses were performed using STATA version 12.0 (Stata Corporation, College  
48 Station, Texas, USA). In this analysis, participants were categorized into four groups based  
49 on routine public sector HIV testing at entry into ANC, and self-reported ART use: (1)  
50 known HIV-positive and established on ART, (2) known HIV-positive but not on ART, (3)  
51 newly diagnosed HIV-positive during the current pregnancy, and (4) HIV-negative, used as  
52 the reference category. Socio-demographic characteristics at enrolment were compared across  
53  
54  
55  
56  
57

1  
2 these four groups. Cronbach's  $\alpha$  was used to assess the reliability of the isiXhosa translated  
3 LMUP in this context, and bivariate analysis using a  $\chi^2$  test compared the isiXhosa LMUP to  
4 the single three-level response question. Associations between characteristics at enrollment  
5 and unplanned pregnancy were explored using  $\chi^2$  and Fisher's exact tests for categorical, and  
6 Wilcoxon rank-sum tests for continuous variables. A multivariable log-binomial regression  
7 model was built to examine independent predictors of unplanned pregnancy, with maternal  
8 age and SES considered as *a priori* confounders. Model fit was explored using Akaike's  
9 information criterion (AIC) and *a priori* hypothesis about confounders namely age and SES.  
10 For the log-binomial regression analysis, LMUP scores were dichotomized into unplanned/  
11 ambivalent (LMUP score 0-9) versus planned pregnancy (LMUP score 10-12).  
12  
13  
14  
15  
16  
17  
18  
19

## 20 RESULTS

21  
22  
23 A total of 2105 women (1512 HIV-positive and 593 HIV-negative), enrolled between March  
24 2013 and August 2015, were included in this analysis. The median age of participants was 28  
25 [inter-quartile range (IQR) 24-33] years, 29% had completed high school, 61% were  
26 unemployed and 43% were married or cohabiting. Across all groups, 20% were nulliparous  
27 (Table 1). Among the overall group of HIV-positive women, 37% were on ART at entry into  
28 ANC, 29% were not on ART but previously diagnosed with HIV, and 34% were newly  
29 diagnosed. Compared to HIV-negative women, HIV-positive women as a group were slightly  
30 older, less likely to be employed and more likely to live in informal housing. Among the  
31 HIV-infected women, those who were newly diagnosed were more likely to be younger, have  
32 completed high school and less likely to be married/co-habiting.  
33  
34  
35  
36  
37  
38  
39  
40

41 Overall, 69% of women reported using at least one contraceptive method in the 12 months  
42 prior to pregnancy recognition. HIV-positive women on ART and HIV-negative women were  
43 more likely to report using a contraceptive method than those who were HIV-positive not on  
44 ART or newly diagnosed (74% and 74%, versus 65% and 63%,  $p < 0.001$ ). Injectable  
45 hormonal contraceptives were the most common contraceptive methods used by both HIV-  
46 positive and HIV-negative women, followed by condom use; hormonal injections were more  
47 commonly reported by HIV-negative women.  
48  
49  
50  
51  
52  
53

54 The LMUP performed well (Cronbach's  $\alpha$ : 0.84), with similar levels of internal consistency  
55 across HIV status. The LMUP performed well in comparison to the  $\chi^2$  test assessing the  
56  
57  
58  
59  
60

1  
2 single item three level response question on pregnancy intention: 99% of women who had an  
3 unplanned pregnancy based on LMUP score also reported unplanned pregnancies based on  
4 the three level response question; 91% of women classified as having a planned pregnancy by  
5 the LMUP score responded similarly to the three level response question ( $p<0.001$ ; Table 2).  
6  
7 Item-rest correlations were  $\geq 0.7$  for all items of the LMUP.  
8  
9

10  
11 The median LMUP score in the total sample was 4 (IQR 3-10; Figure 1). Nearly half (46%)  
12 of all pregnancies were unplanned (LMUP score: 0-3); 29% of women had ambivalent  
13 pregnancy intentions (LMUP score: 4-9); and 25% had a planned pregnancy (LMUP score:  
14 10-12). Compared to HIV-positive women, fewer HIV-negative women experienced an  
15 unplanned pregnancy (33% vs. 50%,  $p<0.001$ ). Across the four comparison groups, the  
16 highest level of unplanned pregnancy was observed in women who were HIV-positive not on  
17 ART while HIV-negative women were the least likely to report an unplanned pregnancy  
18 (54% vs.33%,  $p<0.001$ ; Figure 2).  
19  
20  
21  
22  
23  
24  
25

26 Women with planned pregnancies were older and more likely to be married/co-habiting.  
27 Among those with an unplanned pregnancy, 75% (721/959) reported using at least one  
28 contraceptive method in the year prior to pregnancy recognition, compared to 58% (257/539)  
29 of those reporting a planned pregnancy. Women who had discussed family planning with  
30 their partner in the past year, and HIV-positive women who had disclosed their HIV status to  
31 their male partner, were less likely to have an unplanned pregnancy (Table 3).  
32  
33  
34  
35  
36  
37

38 In a multivariable log-binomial regression model adjusted for age, parity, relationship status  
39 and SES, unplanned pregnancy was associated with HIV-ART status. Compared to HIV-  
40 negative women, HIV-positive women not receiving ART were most likely to have an  
41 unplanned pregnancy [adjusted odds ratio (aOR): 1.57; 95% confidence interval (CI): 1.13-  
42 2.15], followed by women newly diagnosed with HIV (aOR: 1.43; 95% CI: 1.05-1.94). There  
43 were no apparent differences in unplanned pregnancy between HIV-negative and HIV-  
44 positive women established on ART. Unplanned pregnancy was also associated with  
45 increasing parity (aOR 1.42; 95% CI: 1.25-1.60) and younger age (compared to 35-44 years  
46 of age: 18-24 years, aOR 1.83; 95% CI: 1.23-2.74; 25-34 years, aOR 1.29; 95% CI 0.95-1.75)  
47 (Table 4). Recent contraceptive use and marital status (married/co-habiting) reduced the odds  
48 of unplanned pregnancy.  
49  
50  
51  
52  
53  
54  
55  
56  
57  
58  
59  
60

1  
2 Including individual proxy measures of SES (employment, education and home type) in the  
3 adjusted model did not change our main findings. The adjusted odds ratio of an unplanned  
4 pregnancy with individual proxy measures of SES (compared to HIV negative women) was  
5 aOR 1.43; 95% CI: 1.05-1.94 in newly diagnosed HIV-positive women, 1.56; 95% CI: 1.13-  
6 2.15 for previously diagnosed HIV positive women not on ART and 1.10 95% CI 0.82-1.47  
7 for previously diagnosed HIV positive women on ART. In comparison, SES was included as  
8 a composite measure, the adjusted odds ratio of an unplanned pregnancy (compared to HIV  
9 negative women) aOR 1.43; 95% CI: 1.05-1.94 in newly diagnosed HIV-positive women,  
10 1.56; 95% CI: 1.13-2.15 for previously diagnosed women not on ART and 1.10; 95% CI:  
11 0.82-1.47 for previously diagnosed HIV positive women on ART).

## 12 **DISCUSSION**

13  
14  
15  
16  
17  
18  
19  
20  
21  
22  
23 This study provides valuable insights into unplanned pregnancy among HIV-positive and  
24 HIV-negative women in peri-urban South Africa. Similar to high levels of approximately 56-  
25 60% of unplanned pregnancy previously reported in South Africa, nearly half (46%) of all  
26 pregnancies in this study were reported as unplanned, evidence that levels of unplanned  
27 pregnancy remain unacceptably high in South Africa.<sup>14 22</sup> Of note, levels of unplanned  
28 pregnancy were considerably higher among HIV-positive compared to HIV-negative women,  
29 particularly among those HIV-positive women not on ART. Contraceptive use mirrored these  
30 results, with the lowest levels of use reported among HIV-positive women newly diagnosed  
31 or previously diagnosed but not using ART.

32  
33  
34  
35  
36  
37  
38  
39  
40  
41  
42  
43  
44  
45  
46  
47  
48  
49  
50  
51  
52  
53  
54  
55  
56  
57  
58  
59  
60  
This study is one of the first to examine pregnancy intentions by HIV status and ART use in  
South Africa. The finding that levels of unplanned pregnancy may be higher among HIV-  
positive compared to HIV-negative women has been previously documented in other African  
countries as well as in high-income countries,<sup>24 25</sup> but has not been previously documented in  
this high burden setting. Although previous research across sub-Saharan Africa has  
demonstrated slightly higher levels of unplanned pregnancy reaching up to 62% among HIV-  
positive women,<sup>14 19 21</sup> the current study provides additional evidence that women who were  
not aware of their HIV status prior to conception and those HIV-positive not on ART may be  
more likely to have an unplanned pregnancy.<sup>19</sup> The lower prevalence of unplanned pregnancy  
observed among ART users compared to those not yet on ART could potentially be linked to  
the family planning services received by HIV-positive women engaged in care. However,

1  
2 one-third of women were only diagnosed HIV-positive at their first ANC visit, highlighting  
3 possible missed opportunities for HIV diagnosis before pregnancy. Our finding that  
4 unplanned pregnancy is associated with younger age, increasing parity and contraceptive use  
5 in the year prior to conception is consistent with previous research.<sup>18 30 31</sup> One study found  
6 that HIV-positive Rwandan women with two or more children were four times more likely to  
7 have an unplanned pregnancy,<sup>18</sup> while evidence from a study Botswana and Swaziland  
8 demonstrated that younger age (<20 years old) and low level of education (not beyond high  
9 school) were associated with an increased odds of an unplanned pregnancy.<sup>19 21</sup> Similar  
10 findings were reported from a high income country.<sup>31</sup> Supporting our findings of high  
11 unplanned pregnancy levels despite high uptake of contraceptives, a South African study  
12 found up to 62% of unplanned pregnancy despite high contraceptive uptake of 89% among  
13 HIV positive and negative women.<sup>14</sup>  
14  
15  
16  
17  
18  
19  
20  
21  
22

23 Reported use of contraceptives prior to unplanned pregnancy was high across all groups,  
24 similar to findings from a study conducted in Swaziland,<sup>32</sup> and may have resulted in women  
25 being more likely to consider their pregnancy unplanned. The high level of unplanned  
26 pregnancy despite high uptake of contraceptives in our study population could potentially be  
27 linked to high contraceptive failure rates, incorrect use or poor adherence to short-acting  
28 methods, presenting an opportunity for improving family planning services. The high levels of  
29 unplanned pregnancy observed among newly diagnosed HIV positive women and HIV  
30 positive women not on ART suggests a potential difference in risk factors, specifically poorer  
31 health seeking behaviours compared to HIV-positive women who have engaged with the  
32 health care facility and are on ART.<sup>8 30 10</sup> Women on ART have also been shown to be twice  
33 as likely to use contraceptive methods compared to HIV-negative women.<sup>15</sup> Even among  
34 HIV positive women on ART in this study who routinely receive family planning services  
35 alongside HIV care services, unplanned pregnancy rate was considerably high. Levels and  
36 methods of contraceptive use differed slightly by HIV status, with use of hormonal injections  
37 more frequently reported by HIV-negative women. Similar to our findings, previous studies  
38 in Southern Africa have shown that uptake of long-acting contraceptive methods such as  
39 intrauterine devices and hormonal implants among HIV-positive women is relatively low,  
40 possibly due to low availability of these options and poorly integrated reproductive health  
41 and HIV services.<sup>22 33 34</sup> In addition, there is a high reliance on injectable hormonal  
42 contraceptives in South Africa which may be because this method is routinely offered at no  
43 cost, after delivery in most public health sector facilities, reflecting the general contraceptive  
44  
45  
46  
47  
48  
49  
50  
51  
52  
53  
54  
55  
56  
57  
58  
59  
60



1  
2 method use patterns across the country.<sup>35</sup> Similar to findings from this study, uptake of  
3  
4 contraceptives is generally high (65%) however, uptake of efficient long-acting contraceptive  
5  
6 methods has been shown to be relatively low, with majority of women relying on the male  
7  
8 condom.<sup>36 15</sup> A study conducted in Cape Town found that only 6% of 538 HIV-positive and  
9  
10 negative women used long acting and permanent contraceptive methods and this finding was  
11  
12 mainly driven by poor knowledge of more efficient long acting and permanent contraceptive  
13  
14 methods. Choice of contraceptive method was primarily based on health care provider  
15  
16 recommendations and convenience.<sup>35</sup>

17  
18 While this study focused on women, the involvement of male partners and education around  
19  
20 family planning and prevention of unplanned pregnancy also requires attention. Our results  
21  
22 illustrate that women who were married or living with their male partners, those who had  
23  
24 discussed family planning with their partners before conception and HIV-positive women  
25  
26 who had disclosed their HIV status to their partners, were less likely to have an unplanned  
27  
28 pregnancy. Similar results from other studies have shown that male partners' attitudes  
29  
30 towards contraception impact strongly on pregnancy planning and contraceptive use among  
31  
32 both HIV-positive and HIV-negative women in other settings.<sup>34</sup>

33  
34 Finally, this study is one of the first to examine the validity of the LMUP within a low- and  
35  
36 middle-income country setting in Africa. The translated LMUP proved to be a reliable  
37  
38 measure of pregnancy intention in this sample, similar to results obtained from another  
39  
40 validation study conducted in Malawi.<sup>37</sup> The LMUP is therefore recommended for use in  
41  
42 research across similar settings in South Africa.

43  
44 This study has some limitations. The cross-sectional design means that causal associations  
45  
46 could not be examined and the significance of some of the predictors identified needs to be  
47  
48 further explored using longitudinal studies. This study was specific to a single urban setting  
49  
50 in South Africa and although it may be representative of existing knowledge of contraceptive  
51  
52 methods, uptake and method preference within similar settings across the country,<sup>35 36</sup> further  
53  
54 research is needed in other countries. As women were asked to report on pregnancy  
55  
56 intentions after pregnancy recognition and entering ANC, acceptance of the pregnancy during  
57  
58 this time may have resulted in over reporting of planned pregnancy. In contrast, women who  
59  
60 terminated their pregnancy without presenting for ANC were not included in this study;  
therefore, the prevalence of unplanned pregnancy may have been underestimated. Finally, as

1  
2 contraceptive use was assessed only as any use of a contraceptive method in the 12 months  
3 prior to pregnancy recognition, our data are not robust to assess consistent contraceptive use  
4 during this time.  
5  
6

7  
8 Despite some limitations, this study is notable and presents key differences between HIV-  
9 positive and HIV-negative women regarding pregnancy intentions and family planning  
10 practices. It is evident from our findings that HIV-positive women regardless of ART use  
11 require additional support to avoid unplanned pregnancy. While further research is required,  
12 young, HIV-positive women and those with previous pregnancies may be particularly  
13 vulnerable. Moreover, our results suggest that HIV-negative women also require improved  
14 engagement in reproductive health services for HIV testing and prevention, as well as family  
15 planning services. There is an urgent need to empower all women in this context with  
16 appropriate and effective tools to prevent unplanned pregnancies. Focused and innovative  
17 interventions may be required to improve women's understanding of various options for  
18 effective family planning.  
19  
20  
21  
22  
23  
24  
25  
26  
27

#### 28 **AUTHOR AFFILIATIONS:**

- 29 1. Division of Epidemiology & Biostatistics, School of Public Health & Family Medicine,  
30 University of Cape Town, Cape Town, South Africa
  - 31 2. Centre for Infectious Disease Epidemiology & Research, School of Public Health &  
32 Family Medicine, University of Cape Town, Cape Town, South Africa
  - 33 3. Anova Health Institute, Johannesburg, South Africa
  - 34 4. ICAP, Columbia University, Mailman School of Public Health, New York, USA
  - 35 5. Department of Obstetrics & Gynaecology, University of Cape Town & New Somerset  
36 Hospital, Cape Town, South Africa
  - 37 6. College of Physicians & Surgeons, Columbia University, New York, USA
- 38  
39  
40  
41  
42  
43  
44  
45

#### 46 **ACKNOWLEDGEMENTS:**

47 The authors wish to thank all members of the research team who made data collection for this  
48 analysis possible, as well as all the women who consented to participate in the studies from  
49 which these data were obtained.  
50  
51  
52  
53

#### 54 **FUNDING:**

55  
56  
57  
58  
59  
60

1  
2 This work was supported by the President's Emergency Plan for AIDS Relief through the  
3 National Institute of Child Health and Human Development, Grant 1R01HD074558.  
4 Additional funding comes from the Elizabeth Glaser Pediatric AIDS Foundation, the South  
5 African Medical Research Council, the Fogarty Foundation (NIH Fogarty International  
6 Center Grant #5R25TW009340), and the Office of AIDS Research.  
7  
8  
9

10 **COMPETING INTERESTS:**

11 None declared.

12  
13 **ETHICS APPROVAL:**

14 Human Research Ethics Committee of the University of Cape Town, Faculty of Health  
15 Sciences and the Columbia University Medical Centre Institutional Review Board.  
16  
17  
18

19  
20 **CONTRIBUTORS:**

21 EJA and LM conceptualized the study. TKP, SLR and AZ directed data collection. VI  
22 conducted the analysis, led data interpretation and drafted the manuscript, with critical inputs  
23 from KB, TKP, SLR, JAM, AZ, GP, EJA and LM. All authors read and approved the final  
24 manuscript to be published.  
25  
26  
27  
28

29  
30 **DATA SHARING STATEMENT**

31 No additional data are available.  
32  
33  
34  
35  
36  
37  
38  
39  
40  
41  
42  
43  
44  
45  
46  
47  
48  
49  
50  
51  
52  
53  
54  
55  
56  
57  
58  
59  
60

## REFERENCES

1. UNAIDS. Global AIDS update 2016. Geneva: UNIADS 2016.
2. UNAIDS Data 2017: UNAIDS 2017
3. Shisana O, Rehle T, Simbayi L, et al. South African national HIV prevalence, incidence and behaviour survey, 2012.
4. The National Antenatal Sentinel HIV Prevalence Survey, South Africa, 2013, National Department of Health.
5. Bhardwaj S, Treger-Slavin L, Barron P, et al. Elimination of mother-to-child transmission of HIV in South Africa: rapid scale-up using quality improvement: prevention of mother-to-child transmission-Progress towards the Millennium Development Goals. *South African Medical Journal* 2014;104(3):239-43.
6. Joyce T, Kaestner R, Korenman S. The stability of pregnancy intentions and pregnancy-related maternal behaviors. *Maternal and Child Health Journal* 2000;4(3):171-78.
7. Mohllajee AP, Curtis KM, Morrow B, et al. Pregnancy intention and its relationship to birth and maternal outcomes. *Obstetrics & Gynecology* 2007;109(3):678-86.
8. Gipson JD, Koenig MA, Hindin MJ. The effects of unintended pregnancy on infant, child, and parental health: a review of the literature. *Studies in family planning* 2008;39(1):18-38.
9. Kost K, Landry DJ, Darroch JE. Predicting maternal behaviors during pregnancy: does intention status matter? *Family planning perspectives* 1998:79-88.
10. Wado YD, Afework MF, Hindin MJ. Unintended pregnancies and the use of maternal health services in southwestern Ethiopia. *BMC international health and human rights* 2013;13(1):36.
11. World Health Organization. PMTCT strategic vision 2010-2015: preventing mother-to-child transmission of HIV to reach the UNGASS and Millennium Development Goals: World health Organization 2010.
12. Reynolds H, Janowitz B, Wilcher R, et al. Contraception to prevent HIV-positive births: current contribution and potential cost savings in PEPFAR countries. *Sexually transmitted infections* 2008;84(Suppl 2):ii49-ii53.
13. Reynolds HW, Janowitz B, Homan R, et al. The value of contraception to prevent perinatal HIV transmission. *Sexually transmitted diseases* 2006;33(6):350-56.
14. Credé S, Hoke T, Constant D, et al. Factors impacting knowledge and use of long acting and permanent contraceptive methods by postpartum HIV positive and negative women in Cape Town, South Africa: a cross-sectional study. *BMC Public Health* 2012;12(1):197.

15. Kaida A, Laher F, Strathdee SA, et al. Contraceptive use and method preference among women in Soweto, South Africa: the influence of expanding access to HIV care and treatment services. *PloS one* 2010;5(11):e13868.
16. National Department of Health. South African Demographic and Health Survey. South Africa, 2003
17. Sedgh G, Singh S, Hussain R. Intended and Unintended Pregnancies Worldwide in 2012 and Recent Trends. *Studies in family planning* 2014;45(3):301-14
18. Kikuchi K, Wakasugi N, Poudel KC, et al. High rate of unintended pregnancies after knowing of HIV infection among HIV positive women under antiretroviral treatment in Kigali, Rwanda. *Bioscience trends* 2011;5(6):255-63.
19. Mayondi GK, Wirth K, Morroni C, et al. Unintended pregnancy, contraceptive use, and childbearing desires among HIV-infected and HIV-uninfected women in Botswana: a cross-sectional study. *BMC public health* 2016;16(1):44.
20. McCoy SI, Buzdugan R, Ralph LJ, et al. Unmet need for family planning, contraceptive failure, and unintended pregnancy among HIV-infected and HIV-uninfected women in Zimbabwe. *PLoS One* 2014;9(8):e105320.
21. Warren CE, Abuya T, Askew I. Family planning practices and pregnancy intentions among HIV-positive and HIV-negative postpartum women in Swaziland: a cross sectional survey. *BMC pregnancy and childbirth* 2013;13(1):150.
22. Schwartz SR, Rees H, Mehta S, et al. High incidence of unplanned pregnancy after antiretroviral therapy initiation: findings from a prospective cohort study in South Africa. *PloS one* 2012;7(4):e36039.
23. Loutfy M, Raboud J, Wong J, et al. High prevalence of unintended pregnancies in HIV-positive women of reproductive age in Ontario, Canada: a retrospective study. *HIV medicine* 2012;13(2):107-17.
24. Loutfy M, Raboud J, Wong J, et al. High prevalence of unintended pregnancies in HIV-positive women of reproductive age in Ontario, Canada: a retrospective study. *HIV Med* 2012;13(2):107-17.
25. Sutton MY, Patel R, Frazier EL. Unplanned pregnancies among HIV-infected women in care—United States. *JAIDS Journal of Acquired Immune Deficiency Syndromes* 2014;65(3):350-58.
26. Myer L, Morroni C, Rebe K. Prevalence and determinants of fertility intentions of HIV-infected women and men receiving antiretroviral therapy in South Africa. *AIDS patient care and STDs* 2007;21(4):278-85.
27. Myer L, Phillips TK, Zerbe A, et al. Optimizing antiretroviral therapy (ART) for maternal and child health (MCH): rationale and design of the MCH-ART study. *Journal of Acquired Immune Deficiency Syndromes (1999)* 2016;72(Suppl 2):S189.

- 1  
2  
3  
4 28. Myer L, Stein DJ, Grimsrud A, et al. Social determinants of psychological distress  
5 in a nationally-representative sample of South African adults. *Social science &*  
6 *medicine* (1982) 2008;66(8):1828-40. doi: 10.1016/j.socscimed.2008.01.025  
7
- 8 29. Barrett G, Smith SC, Wellings K. Conceptualisation, development, and evaluation  
9 of a measure of unplanned pregnancy. *Journal of epidemiology and community*  
10 *health* 2004;58(5):426-33.  
11
- 12 30. Julia Raifman TC, Frank Tanser, Tinofa Mutevedzi, Philippa Matthews, Kobus  
13 Herbst, Deenan Pillay, Till Bärnighausen. Preventing Unintended Pregnancy and  
14 HIV Transmission: Effects of the HIV Treatment Cascade on Contraceptive Use and  
15 Choice in Rural KwaZulu-Natal. *Journal of acquired immune deficiency syndromes*  
16 (1999) 2014;67:S218-S27.  
17
- 18 31. Oulman E, Kim TH, Yunis K, Tamim H. Prevalence and predictors of unintended  
19 pregnancy among women: an analysis of the Canadian Maternity Experiences  
20 Survey. *BMC Pregnancy Childbirth*. 2015;15:260.  
21
- 22 32. Warren CE, Abuya T, Askew I. Family planning practices and pregnancy intentions  
23 among HIV-positive and HIV-negative postpartum women in Swaziland: a cross  
24 sectional survey. *BMC pregnancy and childbirth*. 2013;13(1):150.  
25
- 26 33. Cooper D, Harries J, Myer L, Orner P, Bracken H, Zweigenthal V. "Life is still  
27 going on": reproductive intentions among HIV-positive women and men in South  
28 Africa. *Soc Sci Med*. 2007;65(2):274-83.  
29
- 30 34. Wall KM, Haddad L, Vwalika B, et al. Unintended pregnancy among HIV positive  
31 couples receiving integrated HIV counseling, testing, and family planning services  
32 in Zambia. *PloS one* 2013;8(9):e75353.  
33
- 34 35. National Department of Health. South Africa Demographic and Health Survey  
35 2016: Key Indicator Report, Statistics South Africa. 2016.  
36
- 37 36. Chersich MF, Wabiri N, Risher K, Shisana O, Celentano D, Rehle T, et al.  
38 Contraception coverage and methods used among women in South Africa: A  
39 national household survey. *South African medical journal = Suid-Afrikaanse*  
40 *tydskrif vir geneeskunde*. 2017;107(4):307-14.  
41
- 42 37. Hall J, Barrett G, Mbwana N, et al. Understanding pregnancy planning in a low-  
43 income country setting: validation of the London measure of unplanned pregnancy  
44 in Malawi. *BMC pregnancy and childbirth* 2013;13(1):200.  
45  
46  
47  
48  
49  
50  
51  
52  
53  
54  
55  
56  
57  
58  
59  
60

Table 1: *Demographic characteristics of women booking for antenatal care by HIV status and antiretroviral treatment*

| <b>Women's characteristics</b>                          | <b>Total<br/>(N=2105)</b> | <b>Known HIV+<br/>on ART<br/>(N=556)</b> | <b>Known HIV+<br/>Not on ART<br/>(N=444)</b> | <b>Newly<br/>Diagnosed<br/>(N=512)</b> | <b>HIV-Negative<br/>(N=2105)</b> | <b>P-value*</b> |
|---------------------------------------------------------|---------------------------|------------------------------------------|----------------------------------------------|----------------------------------------|----------------------------------|-----------------|
| Age, years                                              | 28 (24-33)                | 31 (28-34)                               | 29 (26-32)                                   | 26 (22-30)                             | 27 (23-32)                       |                 |
| Age Category                                            |                           |                                          |                                              |                                        |                                  |                 |
| 18-24                                                   | 532 (25)                  | 51 (9)                                   | 77 (17)                                      | 187 (37)                               | 217 (37)                         | <0.001          |
| 25-34                                                   | 1235 (59)                 | 368 (66)                                 | 307 (69)                                     | 276 (54)                               | 284 (48)                         |                 |
| 35-44                                                   | 338 (16)                  | 137 (25)                                 | 60 (14)                                      | 49 (9)                                 | 92 (15)                          |                 |
| Parity                                                  | 1 (1-2)                   | 2 (1-2)                                  | 2 (1-2)                                      | 1 (0-2)                                | 1 (0-2)                          | <0.001          |
| Completed High School                                   | 601 (29)                  | 109 (20)                                 | 103 (23)                                     | 359 (70)                               | 236 (40)                         | <0.001          |
| Employment Status                                       |                           |                                          |                                              |                                        |                                  |                 |
| Employed                                                | 833 (39)                  | 210 (38)                                 | 144 (32)                                     | 200 (39)                               | 275 (46)                         | <0.001          |
| Housing                                                 |                           |                                          |                                              |                                        |                                  |                 |
| Informal                                                | 1100 (52)                 | 318 (57)                                 | 236 (53)                                     | 270 (53)                               | 276 (47)                         | 0.005           |
| Socioeconomic Status (SES)                              |                           |                                          |                                              |                                        |                                  |                 |
| Low                                                     | 524 (25)                  | 166 (30)                                 | 132 (30)                                     | 139 (27)                               | 87 (15)                          |                 |
| Low-Moderate                                            | 469 (22)                  | 134 (24)                                 | 103 (23)                                     | 108 (21)                               | 124 (21)                         |                 |
| Moderate-High                                           | 565 (27)                  | 164 (30)                                 | 116 (26)                                     | 127 (25)                               | 158 (27)                         |                 |
| High                                                    | 541 (26)                  | 92 (16)                                  | 93 (21)                                      | 138 (27)                               | 218 (37)                         |                 |
| Married/Cohabiting                                      | 882 (43)                  | 258 (47)                                 | 200 (47)                                     | 180 (36)                               | 244 (42)                         | <0.001          |
| Disclosed HIV Status to Current Partner                 | 816 (55)                  | 462 (84)                                 | 289 (67)                                     | 65 (13)                                | NA                               | <0.001          |
| Single item question - Current Pregnancy Intention      |                           |                                          |                                              |                                        |                                  |                 |
| Unintended                                              | 1347 (64)                 | 310 (56)                                 | 291 (66)                                     | 343 (67)                               | 403 (68)                         | <0.001          |
| Intended                                                | 752 (36)                  | 244 (44)                                 | 152 (34)                                     | 167 (33)                               | 189 (32)                         |                 |
| Unsure                                                  | 5 (0)                     | 2 (0)                                    | 1 (0)                                        | 2 (0)                                  | 0 (0)                            |                 |
| Used Contraceptives in Past 12 Months                   | 1459 (69)                 | 414 (74)                                 | 287 (65)                                     | 320 (63)                               | 438 (74)                         | <0.001          |
| Contraceptive Method Used in Past 12 Months             |                           |                                          |                                              |                                        |                                  |                 |
| None                                                    | 646 (31)                  | 142 (26)                                 | 157 (36)                                     | 192 (38)                               | 155 (26)                         | <0.001          |
| Oral Contraceptive                                      | 57 (3)                    | 5 (1)                                    | 8 (2)                                        | 12 (3)                                 | 32 (5)                           |                 |
| Injectable                                              | 752 (36)                  | 152 (27)                                 | 139 (31)                                     | 155 (30)                               | 306 (52)                         |                 |
| IUD                                                     | 8 (0)                     | 0                                        | 2                                            | 2 (0)                                  | 4 (1)                            |                 |
| Sterilization                                           | 1 (0)                     | 0                                        | 0                                            | 0                                      | 1 (0)                            |                 |
| Condom                                                  | 641 (30)                  | 257 (46)                                 | 138 (31)                                     | 151 (29)                               | 95 (16)                          |                 |
| Discussed Family Planning with Partner in Past 12months | 964 (49)                  | 275 (54)                                 | 198 (49)                                     | 235 (50)                               | 256 (44)                         | 0.006           |

Note: Values are given as number (percentage) or median (interquartile range)

Abbreviations: HIV+, HIV positive; HIV-, HIV negative; ART, Antiretroviral therapy; IQR, inter-quartile range

\*Chi-square or Fisher's exact tests were used to assess bivariate associations

Table 2: *The London Measure of Unplanned Pregnancy intention scores in comparison with the single item on pregnancy intentions*

| <b>Single item - Pregnancy Intention</b> | <b>London Measure of Unplanned Pregnancy</b> |                              |                               |                            |
|------------------------------------------|----------------------------------------------|------------------------------|-------------------------------|----------------------------|
|                                          | <b>Total<br/>(N=2105)</b>                    | <b>Unplanned<br/>(N=959)</b> | <b>Ambivalent<br/>(N=607)</b> | <b>Planned<br/>(N=539)</b> |
| <b>No</b>                                | 1347 (64)                                    | <b>950 (99)</b>              | 346 (57)                      | 51 (9)                     |
| <b>Yes</b>                               | 752 (36)                                     | 8 (1)                        | 256 (42)                      | <b>488 (91)</b>            |
| <b>Unsure</b>                            | 5 (0)                                        | 0 (0)                        | <b>5 (1)</b>                  | 0 (0)                      |

Note: Values are given as number (percentage)

Table 3: Demographic characteristics of participants by the London Measure of Unplanned Pregnancy intention categories

| Women's Characteristics                                 | Total<br>(N=2105) | Unplanned<br>(N=959) | Ambivalent<br>(N=607) | Planned<br>(N=539) | P-value* |
|---------------------------------------------------------|-------------------|----------------------|-----------------------|--------------------|----------|
| Age, years                                              | 28 (24-33)        | 28 (24-32)           | 28 (25-33)            | 29 (25-33)         | <0.001   |
| Age Category                                            |                   |                      |                       |                    |          |
| 18-24                                                   | 532 (25)          | 274 (29)             | 150 (25)              | 108 (20)           |          |
| 25-34                                                   | 1235 (59)         | 548 (57)             | 356 (59)              | 331 (61)           | 0.004    |
| 35-44                                                   | 338 (16)          | 137 (14)             | 101 (17)              | 100 (19)           |          |
| Parity, Median                                          | 1 (1-2)           | 1 (1-2)              | 1 (1-2)               | 1 (1-2)            | <0.001   |
| Completed High School                                   |                   |                      |                       |                    |          |
| Yes                                                     | 601 (29)          | 236 (25)             | 205 (34)              | 160 (30)           | <0.001   |
| Level of Education                                      |                   |                      |                       |                    |          |
| Primary                                                 | 73 (3)            | 38 (4)               | 16 (3)                | 19 (3)             |          |
| Secondary                                               | 1973 (94)         | 889 (93)             | 574 (94)              | 510 (95)           | 0.309    |
| Tertiary                                                | 59 (3)            | 32 (3)               | 17 (3)                | 10 (2)             |          |
| Employment Status                                       |                   |                      |                       |                    |          |
| Employed                                                | 833 (39)          | 352 (37)             | 265 (44)              | 212 (39)           | 0.022    |
| Housing                                                 |                   |                      |                       |                    |          |
| Informal                                                | 1100 (52)         | 476 (50)             | 307 (51)              | 317 (59)           | 0.002    |
| Socio-economic Status                                   |                   |                      |                       |                    |          |
| Low                                                     | 524 (25)          | 274 (29)             | 118 (19)              | 132 (25)           |          |
| Low-Moderate                                            | 469 (22)          | 195 (20)             | 143 (24)              | 131 (24)           | 0.004    |
| Moderate-High                                           | 565 (27)          | 251 (26)             | 167 (28)              | 147 (27)           |          |
| High                                                    | 541 (26)          | 238 (25)             | 175 (29)              | 128 (24)           |          |
| Married/Cohabiting                                      |                   |                      |                       |                    |          |
| Yes                                                     | 882 (43)          | 273 (30)             | 242 (40)              | 367 (69)           | <0.001   |
| Disclosed HIV Status to Current Partner (HIV+ Women)    | 816 (55)          | 367 (50)             | 214 (56)              | 235 (64)           | <0.001   |
| Intention of Current Pregnancy                          |                   |                      |                       |                    |          |
| Unintended                                              | 1347 (64)         | 950 (99)             | 346 (57)              | 51 (9)             |          |
| Intended                                                | 752 (36)          | 8 (1)                | 256 (42)              | 488 (91)           | <0.001   |
| Unsure                                                  | 5 (0)             | 0 (0)                | 5 (1)                 | 0 (0)              |          |
| Used Contraceptive in Past 12 Months                    | 1459 (69)         | 721 (75)             | 427 (70)              | 311 (58)           | <0.001   |
| Contraceptive Method Used in Past 12 Months             |                   |                      |                       |                    |          |
| None                                                    | 646 (31)          | 238 (25)             | 180 (30)              | 228 (42)           |          |
| Oral Contraceptive                                      | 57 (3)            | 26 (3)               | 16 (3)                | 15 (3)             |          |
| Injectable                                              | 752 (36)          | 335 (35)             | 233 (38)              | 184 (34)           | <0.001   |
| IUD                                                     | 8 (0)             | 4 (0)                | 2 (0)                 | 2 (0)              |          |
| Sterilization                                           | 1 (0)             | 0 (0)                | 1 (0)                 | 0 (0)              |          |
| Condom                                                  | 641 (30)          | 356 (37)             | 175 (29)              | 110 (20)           |          |
| Discussed Family Planning with Partner in Past 12months | 964 (49)          | 234 (26)             | 347 (60)              | 383 (78)           | <0.001   |

Note: Values are given as number (percentage) or median (interquartile range)

\*Chi-square or Fisher's exact tests were used to assess bivariate associations



Table 4: *Multivariable log-binomial regression model predicting unplanned pregnancy among HIV-positive and HIV-negative women*

| Variables                                   | Univariate analysis |            |         | Multivariate analysis |           |         |
|---------------------------------------------|---------------------|------------|---------|-----------------------|-----------|---------|
|                                             | OR                  | 95% CI     | p-value | AOR                   | 95% CI    | p-value |
| <b>HIV Status and ART Use</b>               |                     |            |         |                       |           |         |
| HIV Negative                                |                     |            |         |                       |           |         |
| Newly Diagnosed                             | 1.35                | 1.03-1.78  | 0.028   | 1.43                  | 1.05-1.94 | 0.020   |
| Known HIV+ - No ART                         | 1.43                | 1.08-1.92  | 0.013   | 1.57                  | 1.13-2.15 | 0.006   |
| Known HIV+ - On ART                         | 1.03                | 0.80-1.34  | 0.766   | 1.10                  | 0.82-1.47 | 0.513   |
| <b>Age Category</b>                         |                     |            |         |                       |           |         |
| 35-44                                       |                     |            |         |                       |           |         |
| 25-34                                       | 1.14                | 0.88- 1.49 | 0.309   | 1.29                  | 0.95-1.75 | 0.099   |
| 18-24                                       | 1.64                | 1.20-2.26  | 0.002   | 1.83                  | 1.23-2.74 | 0.003   |
| <b>Parity</b>                               |                     |            |         |                       |           |         |
| Married/Cohabiting                          |                     |            |         |                       |           |         |
| No                                          |                     |            |         |                       |           |         |
| Yes                                         | 0.23                | 0.19- 0.29 | 0.000   | 0.19                  | 0.15-0.24 | 0.000   |
| <b>Used Contraceptive in Past 12 Months</b> |                     |            |         |                       |           |         |
| No                                          |                     |            |         |                       |           |         |
| Yes                                         | 0.73                | 0.59-0.91  | 0.005   | 1.94                  | 1.55-2.43 | 0.000   |
| <b>Socioeconomic Status</b>                 |                     |            |         |                       |           |         |
| Low                                         |                     |            |         |                       |           |         |
| Low-Middle                                  | 0.86                | 0.65-1.15  | 0.329   | 0.79                  | 0.58-1.08 | 0.151   |
| Middle-High                                 | 0.95                | 0.73-1.26  | 0.755   | 0.74                  | 0.54-1.00 | 0.054   |
| High                                        | 1.08                | 0.82-1.44  | 0.561   | 0.84                  | 0.61-1.16 | 0.301   |
| <b>Finished High School</b>                 |                     |            |         |                       |           |         |
| No                                          |                     |            |         |                       |           |         |
| Yes                                         | 0.92                | 0.74-1.15  | 0.499   | -                     | -         | -       |
| <b>Employed</b>                             |                     |            |         |                       |           |         |
| No                                          |                     |            |         |                       |           |         |
| Yes                                         | 1.00                | 0.81-1.22  | 0.994   | -                     | -         | -       |
| <b>Housing</b>                              |                     |            |         |                       |           |         |
| Informal                                    |                     |            |         |                       |           |         |
| Formal                                      | 1.42                | 1.17-1.73  | 0.000   | -                     | -         | -       |
| <b>Gravidity</b>                            |                     |            |         |                       |           |         |
|                                             | 1.06                | 0.97-1.16  | 0.201   | -                     | -         | -       |

**Abbreviations:** OR, Odds ratio; AOR, Adjusted Odds ratio; CI, Confidence interval

## FIGURE LEGENDS

Figure 1: The distribution of the London Measure of Unplanned Pregnancy scores in HIV positive and negative pregnant women booking for antenatal care, 2013-2015.

Figure 2: The London Measure of Unplanned Pregnancy score categories stratified by HIV status and antiretroviral therapy use.



The distribution of the London Measure of Unplanned Pregnancy scores in HIV positive and negative pregnant women booking for antenatal care, 2013-2015.

284x208mm (300 x 300 DPI)

View only

1  
2  
3  
4  
5  
6  
7  
8  
9  
10  
11  
12  
13  
14  
15  
16  
17  
18  
19  
20  
21  
22  
23  
24  
25  
26  
27  
28  
29  
30  
31  
32  
33  
34  
35  
36  
37  
38  
39  
40  
41  
42  
43  
44  
45  
46  
47  
48  
49  
50  
51  
52  
53  
54  
55  
56  
57  
58  
59  
60



The London Measure of Unplanned Pregnancy score categories stratified by HIV status and antiretroviral therapy use.

84x59mm (300 x 300 DPI)

STROBE Statement—Checklist of items that should be included in reports of *cross-sectional studies*

|                              | Item No | Recommendation                                                                                                                                                                                                                                                                                                                                                                                             |
|------------------------------|---------|------------------------------------------------------------------------------------------------------------------------------------------------------------------------------------------------------------------------------------------------------------------------------------------------------------------------------------------------------------------------------------------------------------|
| <b>Title and abstract</b>    | 1       | (a) Indicate the study's design with a commonly used term in the title or the abstract ( <b>p. 1</b> )<br>(b) Provide in the abstract an informative and balanced summary of what was done and what was found ( <b>pp. 2–3</b> )                                                                                                                                                                           |
| <b>Introduction</b>          |         |                                                                                                                                                                                                                                                                                                                                                                                                            |
| Background/rationale         | 2       | Explain the scientific background and rationale for the investigation being reported ( <b>p. 1, paragraph 2 + p. 5, paragraph 1</b> )                                                                                                                                                                                                                                                                      |
| Objectives                   | 3       | State specific objectives, including any prespecified hypotheses ( <b>p. 5, paragraph 3</b> )                                                                                                                                                                                                                                                                                                              |
| <b>Methods</b>               |         |                                                                                                                                                                                                                                                                                                                                                                                                            |
| Study design                 | 4       | Present key elements of study design early in the paper ( <b>pp. 6-7</b> )                                                                                                                                                                                                                                                                                                                                 |
| Setting                      | 5       | Describe the setting, locations, and relevant dates, including periods of recruitment, exposure, follow-up, and data collection ( <b>pp. 6-7</b> )                                                                                                                                                                                                                                                         |
| Participants                 | 6       | (a) Give the eligibility criteria, and the sources and methods of selection of participants ( <b>p. 6, paragraph 1</b> )                                                                                                                                                                                                                                                                                   |
| Variables                    | 7       | Clearly define all outcomes, exposures, predictors, potential confounders, and effect modifiers. Give diagnostic criteria, if applicable ( <b>pp. 6-7</b> )                                                                                                                                                                                                                                                |
| Data sources/<br>measurement | 8*      | For each variable of interest, give sources of data and details of methods of assessment (measurement). Describe comparability of assessment methods if there is more than one group ( <b>pp. 6-7</b> )                                                                                                                                                                                                    |
| Bias                         | 9       | Describe any efforts to address potential sources of bias ( <b>pp. 6 paragraph 3</b> )                                                                                                                                                                                                                                                                                                                     |
| Study size                   | 10      | Explain how the study size was arrived at ( <b>p. 6</b> )                                                                                                                                                                                                                                                                                                                                                  |
| Quantitative variables       | 11      | Explain how quantitative variables were handled in the analyses. If applicable, describe which groupings were chosen and why ( <b>p. 7</b> )                                                                                                                                                                                                                                                               |
| Statistical methods          | 12      | (a) Describe all statistical methods, including those used to control for confounding ( <b>p. 7</b> )<br>(b) Describe any methods used to examine subgroups and interactions ( <b>p. 7</b> )<br>(c) Explain how missing data were addressed ( <b>p. 7</b> )<br>(d) If applicable, describe analytical methods taking account of sampling strategy<br>(e) Describe any sensitivity analyses ( <b>p. 7</b> ) |
| <b>Results</b>               |         |                                                                                                                                                                                                                                                                                                                                                                                                            |
| Participants                 | 13*     | (a) Report numbers of individuals at each stage of study—eg numbers potentially eligible, examined for eligibility, confirmed eligible, included in the study, completing follow-up, and analysed ( <b>p. 8</b> )<br>(b) Give reasons for non-participation at each stage ( <b>N/A</b> )<br>(c) Consider use of a flow diagram ( <b>N/A</b> )                                                              |
| Descriptive data             | 14*     | (a) Give characteristics of study participants (eg demographic, clinical, social) and information on exposures and potential <b>confounders</b> ( <b>Table 1</b> )<br>(b) Indicate number of participants with missing data for each variable of interest ( <b>N/A</b> )                                                                                                                                   |
| Outcome data                 | 15*     | Report numbers of outcome events or summary measures ( <b>p. 7</b> )                                                                                                                                                                                                                                                                                                                                       |
| Main results                 | 16      | (a) Give unadjusted estimates and, if applicable, confounder-adjusted estimates and their precision (eg, 95% confidence interval). Make clear which confounders were adjusted for and why they were included ( <b>p. 9 + Table 4</b> )<br>(b) Report category boundaries when continuous variables were categorized ( <b>N/A</b> )                                                                         |

(c) If relevant, consider translating estimates of relative risk into absolute risk for a meaningful time period

|                          |    |                                                                                                                                                                                                            |
|--------------------------|----|------------------------------------------------------------------------------------------------------------------------------------------------------------------------------------------------------------|
| Other analyses           | 17 | Report other analyses done—eg analyses of subgroups and interactions, and sensitivity analyses ( <i>p. 21 +Table 2</i> )                                                                                   |
| <b>Discussion</b>        |    |                                                                                                                                                                                                            |
| Key results              | 18 | Summarise key results with reference to study objectives applicable ( <b>pp. 10-11</b> )                                                                                                                   |
| Limitations              | 19 | Discuss limitations of the study, taking into account sources of potential bias or imprecision. Discuss both direction and magnitude of any potential bias applicable ( <b>pp. 12-13</b> )                 |
| Interpretation           | 20 | Give a cautious overall interpretation of results considering objectives, limitations, multiplicity of analyses, results from similar studies, and other relevant evidence applicable ( <b>pp. 10-13</b> ) |
| Generalisability         | 21 | Discuss the generalisability (external validity) of the study results applicable ( <b>p. 11</b> )                                                                                                          |
| <b>Other information</b> |    |                                                                                                                                                                                                            |
| Funding                  | 22 | Give the source of funding and the role of the funders for the present study and, if applicable, for the original study on which the present article is based ( <b>p. 13</b> )                             |

\*Give information separately for exposed and unexposed groups.

**Note:** An Explanation and Elaboration article discusses each checklist item and gives methodological background and published examples of transparent reporting. The STROBE checklist is best used in conjunction with this article (freely available on the Web sites of PLoS Medicine at <http://www.plosmedicine.org/>, Annals of Internal Medicine at <http://www.annals.org/>, and Epidemiology at <http://www.epidem.com/>). Information on the STROBE Initiative is available at [www.strobe-statement.org](http://www.strobe-statement.org).
